# Supplementary material for: COI-Barcoding and Species Delimitation Assessment of Toad-Headed Agamas of the Genus Phrynocephalus (Agamidae, Squamata) Reveal Unrecognized Diversity in Central Eurasia
Source: MDPI journal article supplement (doi:10.3390/d15020149), 2023-01-21
Supplement: s1 [file s1]

**Table S1.** List of specimens used in phylogenetic analysis.

| GenBank AN | Species Before      | 63 MOTUs by ASAP    | Haplo Type | Voucher ID          | Locality                                                    | N      | E      | Source            |
|------------|---------------------|---------------------|------------|---------------------|-------------------------------------------------------------|--------|--------|-------------------|
| KT182059   | <i>P. ahvazicus</i> | <i>P. ahvazicus</i> | ah         | ZISP TS-2289 (A-13) | Iran, Khuzestan, Ahvaz [type locality of <i>ahvazicus</i> ] | 31.39  | 48.59  | [18]              |
| KT182060   | <i>P. ahvazicus</i> | <i>P. ahvazicus</i> | ah         | ZISP TS-2291 (A-14) | Iran, Khuzestan, Ahvaz                                      | 31.39  | 48.59  | [18]              |
| MK461331   | <i>P. ahvazicus</i> | <i>P. ahvazicus</i> | ah         | ZMMU R-12713-1      | Iran, Khuzestan, 80 km NW from Ahvaz town                   | 32.5   | 48.12  | <i>this study</i> |
| MK461332   | <i>P. ahvazicus</i> | <i>P. ahvazicus</i> | ah         | ZMMU R-12713-2      | Iran, Khuzestan, 80 km NW from Ahvaz town                   | 32.5   | 48.12  | <i>this study</i> |
| KF691708   | <i>P. ahvazicus</i> | <i>P. ahvazicus</i> | ah         | ZMMU R-12713-3      | Iran, Khuzestan, 80 km NW Ahvaz                             | 32.5   | 48.12  | [12]              |
| MK461330   | <i>P. ahvazicus</i> | <i>P. ahvazicus</i> | ah         | ZMMU R-12713-4      | Iran, Khuzestan, 80 km NW Ahvaz                             | 32.5   | 48.12  | <i>this study</i> |
| MW940441   | <i>P. ahvazicus</i> | <i>P. ahvazicus</i> | ah         | ERP 8934            | Iran, Khuzestan province, Ahvaz                             | -      | -      | [87]              |
| MW940442   | <i>P. ahvazicus</i> | <i>P. ahvazicus</i> | ah         | ERP 8934            | Iran, Khuzestan province, Ahvaz                             | -      | -      | [87]              |
| KT182058   | <i>P. ahvazicus</i> | <i>P. ahvazicus</i> | ah         | ZISP TS-2292 (A-12) | Iran, Khuzestan, Ahvaz                                      | 31.39  | 48.59  | [18]              |
| KF691729   | <i>P. alpheraki</i> | <i>P. alpheraki</i> | al1        | ZMMU R-12670        | Kazakhstan, Almaty, Syugaty Depression, 25 km E from Kokpek | 43.45  | 78.9   | [12]              |
| MK461333   | <i>P. alpheraki</i> | <i>P. alpheraki</i> | al2        | ZMMU R-12180-1      | Kazakhstan, Charyn river valley, Bogety mts. (Ulken-Bogety) | 43.62  | 79.16  | <i>this study</i> |
| MK461334   | <i>P. alpheraki</i> | <i>P. alpheraki</i> | al2        | ZMMU R-12180-2      | Kazakhstan, Charyn river valley, Bogety mts. (Ulken-Bogety) | 43.62  | 79.16  | <i>this study</i> |
| MK461335   | <i>P. alpheraki</i> | <i>P. alpheraki</i> | al1        | ZMMU R-12334        | Kazakhstan, Almaty, Sugaty Valley                           | 43.489 | 79.053 | <i>this study</i> |
| MK461336   | <i>P. alpheraki</i> | <i>P. alpheraki</i> | al1        | ZMMU R-12335        | Kazakhstan, Sugaty Valley                                   | 43.464 | 78.915 | <i>this study</i> |
| MK461337   | <i>P. alpheraki</i> | <i>P. alpheraki</i> | al2        | ZMMU R-12326-1      | Kazakhstan, Almaty, Ily Valley, 30 km W from Dzharkent      | 44.143 | 79.643 | <i>this study</i> |
| MK461338   | <i>P. alpheraki</i> | <i>P. alpheraki</i> | al2        | ZMMU R-12511        | Kazakhstan, Ili river valley, Mt. Katutau                   | 43.931 | 79.209 | <i>this study</i> |
| MK461339   | <i>P. alpheraki</i> | <i>P. alpheraki</i> | al1        | ZMMU R-12508        | Kazakhstan, Sugata valley, on the road to Zharkent          | 43.629 | 79.351 | <i>this study</i> |
| MK461340   | <i>P. alpheraki</i> | <i>P. alpheraki</i> | al2        | ZMMU R-13086-5      | Kazakhstan, Altin-Emel`                                     | 43.972 | 78.639 | <i>this study</i> |

|          |                      |                      |            |                     |                                                                    |        |        |                   |
|----------|----------------------|----------------------|------------|---------------------|--------------------------------------------------------------------|--------|--------|-------------------|
| MK461341 | <i>P. alpheraki</i>  | <i>P. alpheraki</i>  | <b>al1</b> | ZMMU R-12667        | Kazakhstan, Almaty, Ili Depression, 3 km S from Tashkarasu         | 43.733 | 79.467 | <i>this study</i> |
| MK461342 | <i>P. alpheraki</i>  | <i>P. alpheraki</i>  | <b>al2</b> | ZMMU R-12811        | Kazakhstan, Taldy-Kurgan, Ili Depression, 10 km E from Aktau Hills | 44.083 | 79.467 | <i>this study</i> |
| MK461343 | <i>P. alpherakii</i> | <i>P. alpherakii</i> | <b>al1</b> | ZMMU R-12512        | Kazakhstan, Uigursky Region, Tashkarassu Village                   | 43.833 | 79.643 | <i>this study</i> |
| JF756686 | <i>P. ananjevae</i>  | <i>P. ananjevae</i>  | <b>an</b>  | HCZ-2, no voucher   | Iran, Fars, Abadeh env. [type locality of <i>ananjevae</i> ]       | 31.129 | 52.203 | [19]              |
| JF756687 | <i>P. ananjevae</i>  | <i>P. ananjevae</i>  | <b>an</b>  | HCZ-1, no voucher   | Iran, Fars, Abadeh env.                                            | 31.129 | 52.203 | [19]              |
| KT182053 | <i>P. arabicus</i>   | <i>P. arabicus</i>   | <b>ar</b>  | ZISP 28704          | Oman, Rub-Al-Khali, Mughshin vicinity                              | 19.83  | 54.67  | [12]              |
| KT182054 | <i>P. arabicus</i>   | <i>P. arabicus</i>   | <b>ar</b>  | -                   | Yemen, 30 km west from Ma'rib by the road to San'a                 | 15.43  | 44.93  | [18]              |
| KT182055 | <i>P. arabicus</i>   | <i>P. arabicus</i>   | <b>ar</b>  | ZISP TS-2541 (A-9)  | Saudi Arabia, Sahnah, 100 km south east of Riyadh                  | 24.04  | 47.23  | [18]              |
| KT182056 | <i>P. arabicus</i>   | <i>P. arabicus</i>   | <b>ar</b>  | ZISP TS-2542 (A-10) | Saudi Arabia, Sahnah, 100 km south east of Riyadh                  | 24.04  | 47.23  | [18]              |
| KT182057 | <i>P. arabicus</i>   | <i>P. arabicus</i>   | <b>ar</b>  | ZISP TS-2540 (A-11) | Saudi Arabia, Sahnah, 100 km south east of Riyadh                  | 24.04  | 47.23  | [18]              |
| MK461344 | <i>P. arabicus</i>   | <i>P. arabicus</i>   | <b>ar</b>  | ZMMU R-12502        | OAE, Abu-Dabi, 30 km SE Al Ain;                                    | 24.366 | 55.644 | <i>this study</i> |
| MK461345 | <i>P. arabicus</i>   | <i>P. arabicus</i>   | <b>ar</b>  | ZMMU R-12502-1      | United Arab Emirates, Abu Dhabi, Al Ain                            | 24.112 | 55.5   | <i>this study</i> |
| MK461346 | <i>P. axillaris</i>  | <i>P. axillaris</i>  | <b>ax1</b> | ZMMU R-14320        | China, Xinjiang, 55 km SE from Urumqi                              | 43.401 | 88.126 | <i>this study</i> |
| MK461347 | <i>P. axillaris</i>  | <i>P. axillaris</i>  | <b>ax2</b> | ZMMU R-14322        | China, Xinjiang, 30 km S from Toksun                               | 42.628 | 88.572 | <i>this study</i> |
| MK461348 | <i>P. axillaris</i>  | <i>P. axillaris</i>  | <b>ax2</b> | ZMMU R-14323        | China, Xinjiang, Lutai, 23 km NE from Ta'erlake-xiang              | 42.014 | 84.592 | <i>this study</i> |
| KF691724 | <i>P. axillaris</i>  | <i>P. axillaris</i>  | <b>ax3</b> | ZMMU R-12302        | China, Xinjiang, Qiemo County                                      | 38.43  | 85.06  | [12]              |
| MK461349 | <i>P. axillaris</i>  | <i>P. axillaris</i>  | <b>ax4</b> | ZMMU R-14319        | China, Xinjiang, Baicheng                                          | 41.556 | 81.207 | <i>this study</i> |

|          |                                 |                         |            |                |                                                                                          |        |        |                   |
|----------|---------------------------------|-------------------------|------------|----------------|------------------------------------------------------------------------------------------|--------|--------|-------------------|
| KF691710 | <i>P. raddei</i>                | <i>P. boettgeri</i>     | <b>bo</b>  | IZIP 0998      | Uzbekistan, Surxondaryo Viloyati, near Termez                                            | 37.34  | 67.32  | [12]              |
| MK461360 | <i>P. scutellatus</i>           | <i>P. brevipes</i>      | <b>br</b>  | ZMMU R-12137-1 | Iran, Khorasan, 40 km N from Gonobad [vicinity of the type locality of <i>brevipes</i> ] | 34.69  | 58.64  | <i>this study</i> |
| MK461361 | <i>P. scutellatus</i>           | <i>P. brevipes</i>      | <b>br</b>  | ZMMU R-12137-2 | Iran, Khorasan, 40 km N from Gonobad                                                     | 34.69  | 58.64  | <i>this study</i> |
| JF756679 | <i>P. cameranoi</i>             | <i>P. cameranoi</i>     | <b>ca1</b> | ZMMU R-12661   | Kazakhstan, SE Sugata valley                                                             | 43.45  | 78.9   | [19]              |
| JF769372 | <i>P. cameranoi</i>             | <i>P. cameranoi</i>     | <b>ca1</b> | ZMMU R-12808   | Kazakhstan, Alma-Ata, Ili Depression, Ulgen-Bogety Mts., Charyn-Borandysu Rd.            | 43.75  | 79.217 | [19]              |
| JF769379 | <i>P. cameranoi</i>             | <i>P. cameranoi</i>     | <b>ca1</b> | ZMMU R-12668   | Kazakhstan, Alma-Ata, Ili Depression, 3 km S from Tashkarasu                             | 43.733 | 79.467 | [19]              |
| JF769381 | <i>P. cameranoi</i>             | <i>P. cameranoi</i>     | <b>ca1</b> | ZMMU R-12664   | Kazakhstan, Alma-Ata, Ili Depression, Charyn river along of Kokpek Chundzha rout         | 43.6   | 79.317 | [19]              |
| JF756680 | <i>P. cameranoi</i>             | <i>P. cameranoi</i>     | <b>ca2</b> | ZMMU R-12663   | Kazakhstan, N Sugata valley                                                              | 43.51  | 79.4   | [19]              |
| JF756681 | <i>P. cameranoi</i>             | <i>P. cameranoi</i>     | <b>ca2</b> | ZMMU R-12669-1 | Kazakhstan, Sugata valley                                                                | 43.45  | 78.9   | [19]              |
| MK461350 | <i>P. cameranoi</i>             | <i>P. cameranoi</i>     | <b>ca2</b> | ZMMU R-12782   | Kazakhstan, Taldy-Kurgan, right board of Kapchagay reservoir                             | 43.883 | 77.7   | <i>this study</i> |
| JF756682 | <i>P. cameranoi</i>             | <i>P. cameranoi</i>     | <b>ca3</b> | ZMMU R-12669-2 | Kazakhstan, Sugata valley                                                                | 43.45  | 78.9   | [19]              |
| MK461402 | <i>P. scutellatus</i>           | <i>P. cf. carinipes</i> | <b>cr</b>  | ZMMU R-11914-1 | Iran, Sistan-e Baluchestan, Nusrat-Abad, Near Nusrat-Abad                                | 29.29  | 59.32  | <i>this study</i> |
| MK461412 | <i>P. scutellatus</i>           | <i>P. cf. carinipes</i> | <b>cr</b>  | ZMMU R-12314   | Iran, Sistan-e Baluchestan, 90 km W from Zahedan, near Nusrat-Abad                       | 29.483 | 59.533 | <i>this study</i> |
| MF039065 | <i>P. erythrurus erythrurus</i> | <i>P. erythrurus</i>    | <b>er</b>  | -              | China, Amdo, Southern Qiangtang Plateau of QTP                                           | 32.15  | 91.58  | [86]              |
| KP232959 | <i>P. forsythii</i>             | <i>P. forsythii</i>     | <b>fo1</b> | no voucher     | China, Xinjiang, Aksu                                                                    | 40.42  | 80.9   | [22]              |
| MK461355 | <i>P. forsythii</i>             | <i>P. forsythii</i>     | <b>fo2</b> | ZMMU R-14324   | China, Xinjiang, N Takla-Makan, Aksu, 5 km N Aral                                        | 40.42  | 81.234 | [19]              |
| MW456559 | <i>P. nasatus</i>               | <i>P. forsythii</i>     | <b>fo3</b> | GXG1093        | China, Xinjiang, Baicheng County                                                         | -      | -      | [145]             |
| KP126516 | <i>P. forsythii</i>             | <i>P. forsythii</i>     | <b>fo4</b> | WGXXG08371     | China, Qiemo County, Xinjiang Uygur Autonomous Region                                    | -      | -      | [146]             |

|          |                             |                             |            |                |                                                                                                       |        |        |                   |
|----------|-----------------------------|-----------------------------|------------|----------------|-------------------------------------------------------------------------------------------------------|--------|--------|-------------------|
| MK461474 | <i>P. nasatus</i>           | <i>P. forsythii</i>         | <b>na</b>  | ZMMU R-14317-4 | China, Xinjiang, Aksu, 75 km NE Aksu, 5.3 km N from Norerik                                           | 41.743 | 80.833 | <i>this study</i> |
| MK461475 | <i>P. nasatus</i>           | <i>P. forsythii</i>         | <b>na</b>  | ZMMU R-14317-2 | China, Xinjiang, Aksu, 75 km NE Aksu, 5.3 km N from Norerik                                           | 41.743 | 80.833 | <i>this study</i> |
| MK461476 | <i>P. nasatus</i>           | <i>P. forsythii</i>         | <b>na</b>  | ZMMU R-14317-3 | China, Xinjiang, Aksu, 75 km NE Aksu, 5.3 km N from Norerik [type locality of <i>nasatus</i> ]        | 41.743 | 80.833 | <i>this study</i> |
| KF691733 | <i>P. frontalis</i>         | <i>P. frontalis</i>         | <b>fr</b>  | ZMMU R-12309   | China, Inner Mongolia, Alashan desert, Bayanmod                                                       | 40.41  | 105.59 | [12]              |
| MK461356 | <i>P. frontalis</i>         | <i>P. frontalis</i>         | <b>fr</b>  | ZMMU R-12309-1 | China, Inner Mongolia, Ordos desert, Bayan-Hot                                                        | 38.67  | 105.62 | [15]              |
| MK461357 | <i>P. frontalis</i>         | <i>P. frontalis</i>         | <b>fr</b>  | ZMMU R-12309-2 | China, Inner Mongolia, Ordos desert, Bayan-Hot                                                        | 38.67  | 105.62 | [15]              |
| KF691731 | <i>P. guttatus guttatus</i> | <i>P. guttatus guttatus</i> | <b>gu3</b> | ZMMU R-12174-3 | Russia, Astrakhan, Dosang                                                                             | 46.88  | 47.92  | [12]              |
| MK461368 | <i>P. guttatus guttatus</i> | <i>P. guttatus guttatus</i> | <b>gu1</b> | ZMMU R-12175-2 | Kazakhstan, Malye Barsuki Sands                                                                       | 47.37  | 60.47  | [13]              |
| MK461369 | <i>P. guttatus guttatus</i> | <i>P. guttatus guttatus</i> | <b>gu3</b> | ZMMU R-12175-1 | Kazakhstan, Malye Barsuki Sands                                                                       | 47.37  | 60.47  | [13]              |
| MK461381 | <i>P. guttatus guttatus</i> | <i>P. guttatus guttatus</i> | <b>gu1</b> | ZMMU R-12169   | Kazakhstan, Aktyubinsk, Aral, Termeibes Mt. Foothills                                                 | 45.96  | 58.3   | [13]              |
| MK461385 | <i>P. guttatus guttatus</i> | <i>P. guttatus guttatus</i> | <b>gu1</b> | ZMMU R-12168-1 | Kazakhstan, Aktyubinsk, Kumzhargan Sands                                                              | 48.33  | 57.36  | [13]              |
| MK461386 | <i>P. guttatus guttatus</i> | <i>P. guttatus guttatus</i> | <b>gu1</b> | ZMMU R-12168-2 | Kazakhstan, Aktyubinsk, Kumzhargan Sands                                                              | 48.33  | 57.36  | [13]              |
| MK461392 | <i>P. guttatus guttatus</i> | <i>P. guttatus guttatus</i> | <b>gu3</b> | ZMMU R-12174-1 | Russia, Astrakhan, Dosang environs                                                                    | 46.88  | 47.92  | [13]              |
| MK461393 | <i>P. guttatus guttatus</i> | <i>P. guttatus guttatus</i> | <b>gu3</b> | ZMMU R-12174-2 | Russia, Astrakhan, Dosang environs                                                                    | 46.88  | 47.92  | [13]              |
| MK461394 | <i>P. guttatus guttatus</i> | <i>P. guttatus guttatus</i> | <b>gu1</b> | ZMMU R-12172   | Kazakhstan, Bolshiye Barsuki Sands, Sorkuduk                                                          | 46.45  | 58.59  | [13]              |
| MK461469 | <i>P. guttatus guttatus</i> | <i>P. guttatus guttatus</i> | <b>gu1</b> | ZMMU R-12938   | Russia, Volgograd, Elton coast                                                                        | 49.083 | 46.783 | [13]              |
| MK461454 | <i>P. guttatus salsatus</i> | <i>P. guttatus guttatus</i> | <b>gu1</b> | ZMMU R-12797   | Turkmenistan, Balkan, Kazachlyshor saline, Kazakhlyshor Rd.                                           | 40.283 | 55.767 | [13]              |
| MK461460 | <i>P. guttatus salsatus</i> | <i>P. guttatus guttatus</i> | <b>gu1</b> | ZMMU R-6918    | Turkmenistan, Balkan, Kazachlyshor saline, 8 km N from Kumsebshen [type locality of <i>salsatus</i> ] | 40.283 | 55.767 | [13]              |

|          |                             |                             |            |                |                                                                    |        |        |      |
|----------|-----------------------------|-----------------------------|------------|----------------|--------------------------------------------------------------------|--------|--------|------|
| MK461383 | <i>P. guttatus kalmykus</i> | <i>P. guttatus guttatus</i> | <b>gu2</b> | ZMMU R-12170   | Russia, Kalmykiya, Chernye Zemli Nature Reserve                    | 45.76  | 45.42  | [13] |
| JF769388 | <i>P. helioscopus</i>       | <i>P. helioscopus</i>       | <b>he1</b> | ZMMU R-12813   | Uzbekistan, Kzyl-Orda, Aral, Vozrozhdeniya island                  | 45.15  | 59.3   | [19] |
| JF769406 | <i>P. helioscopus</i>       | <i>P. helioscopus</i>       | <b>he1</b> | ZMMU R-12157   | Kazakhstan, Karaganda, Aktau, 58 km of Aktau - Fort Shevchenko Rd. | 44.23  | 51.6   | [19] |
| JF769405 | <i>P. helioscopus</i>       | <i>P. helioscopus</i>       | <b>he2</b> | ZMMU R-12158   | Kazakhstan, Aktyubinsk, Aral, Bolshiye Barsuki, Yuzhnoye           | 46.18  | 58.4   | [19] |
| JF769409 | <i>P. helioscopus</i>       | <i>P. helioscopus</i>       | <b>he2</b> | ZMMU R-12151   | Uzbekistan, Qoraqalpog`iston, Nukus, Bestube (Beshtube)            | 42.63  | 59.67  | [19] |
| JF769410 | <i>P. helioscopus</i>       | <i>P. helioscopus</i>       | <b>he2</b> | ZMMU R-12153-2 | Uzbekistan, Qoraqalpog`iston, Kungrad, Road from Ust-Urt           | 43.991 | 57.972 | [19] |
| JF769411 | <i>P. helioscopus</i>       | <i>P. helioscopus</i>       | <b>he2</b> | ZMMU R-12153-1 | Uzbekistan, Qoraqalpog`iston, Kungrad, Road from Ust-Urt           | 43.991 | 57.972 | [19] |
| JF769413 | <i>P. helioscopus</i>       | <i>P. helioscopus</i>       | <b>he2</b> | IZIP Phh-003   | Uzbekistan, Qoraqalpog`iston, Zhaslyk                              | 43.933 | 57.498 | [19] |
| JF769414 | <i>P. helioscopus</i>       | <i>P. helioscopus</i>       | <b>he2</b> | ZMMU R-12150   | Uzbekistan, Qoraqalpog`iston, Ravshan (Raushan)                    | 42.93  | 59.13  | [19] |
| JF756684 | <i>P. helioscopus</i>       | <i>P. helioscopus</i>       | <b>he3</b> | ZMMU R-12519   | Kazakhstan, Barsa-Kelmes island                                    | 45.7   | 59.867 | [19] |
| JF769363 | <i>P. helioscopus</i>       | <i>P. helioscopus</i>       | <b>he3</b> | ZMMU R-13241   | Kazakhstan, Aralsk - Kamyshlybash road                             | 46.228 | 61.367 | [19] |
| JF769364 | <i>P. helioscopus</i>       | <i>P. helioscopus</i>       | <b>he3</b> | ZMMU R-13240-2 | Kazakhstan, Aralsk env.                                            | 46.794 | 62.133 | [19] |
| JF769365 | <i>P. helioscopus</i>       | <i>P. helioscopus</i>       | <b>he3</b> | ZMMU R-13240-1 | Kazakhstan, Aralsk env.                                            | 46.794 | 62.133 | [19] |
| JF769366 | <i>P. helioscopus</i>       | <i>P. helioscopus</i>       | <b>he3</b> | ZMMU R-13240-3 | Kazakhstan, Aralsk env.                                            | 46.794 | 62.133 | [19] |
| JF769369 | <i>P. helioscopus</i>       | <i>P. helioscopus</i>       | <b>he3</b> | ZMMU R-13242-3 | Kazakhstan, Aralsk                                                 | 46.8   | 61.667 | [19] |
| JF769370 | <i>P. helioscopus</i>       | <i>P. helioscopus</i>       | <b>he3</b> | ZMMU R-13242-2 | Kazakhstan, Aralsk                                                 | 46.8   | 61.667 | [19] |
| JF769371 | <i>P. helioscopus</i>       | <i>P. helioscopus</i>       | <b>he3</b> | ZMMU R-13242-1 | Kazakhstan, Aralsk                                                 | 46.8   | 61.667 | [19] |
| JF769401 | <i>P. helioscopus</i>       | <i>P. helioscopus</i>       | <b>he3</b> | ZMMU R-12162   | Kazakhstan, Aktyubinsk, Aral, Kulandy peninsula                    | 46.04  | 59.28  | [19] |

|          |                       |                       |            |                |                                                                     |        |        |      |
|----------|-----------------------|-----------------------|------------|----------------|---------------------------------------------------------------------|--------|--------|------|
| JF769402 | <i>P. helioscopus</i> | <i>P. helioscopus</i> | <b>he3</b> | ZMMU R-12160-1 | Kazakhstan, Aktyubinsk, Aral, Akespe                                | 46.77  | 60.5   | [19] |
| JF769403 | <i>P. helioscopus</i> | <i>P. helioscopus</i> | <b>he3</b> | ZMMU R-12160-2 | Kazakhstan, Aktyubinsk, Aral, Akespe                                | 46.77  | 60.5   | [19] |
| JF769404 | <i>P. helioscopus</i> | <i>P. helioscopus</i> | <b>he3</b> | ZMMU R-12156   | Kazakhstan, Aktyubinsk, Northern Aral, Akespe                       | 46.77  | 60.5   | [19] |
| JF756683 | <i>P. helioscopus</i> | <i>P. helioscopus</i> | <b>he4</b> | ZMMU R-12527   | Kazakhstan, N Zhanakala settl.                                      | 50.217 | 73.817 | [19] |
| JF769367 | <i>P. helioscopus</i> | <i>P. helioscopus</i> | <b>he4</b> | ZMMU R-13242-5 | Kazakhstan, Aralsk                                                  | 46.8   | 61.667 | [19] |
| JF769368 | <i>P. helioscopus</i> | <i>P. helioscopus</i> | <b>he4</b> | ZMMU R-13242-4 | Kazakhstan, Aralsk                                                  | 46.8   | 61.667 | [19] |
| JF769399 | <i>P. helioscopus</i> | <i>P. helioscopus</i> | <b>he4</b> | ZMMU R-12161-1 | Kazakhstan, Shymkent, Kyzyl-Kiya, Kyzyl-Kiya                        | 41.64  | 69.36  | [19] |
| JF769400 | <i>P. helioscopus</i> | <i>P. helioscopus</i> | <b>he4</b> | ZMMU R-12161-2 | Kazakhstan, Shymkent, Kyzyl-Kiya, Kyzyl-Kiya                        | 41.64  | 69.36  | [19] |
| JF769407 | <i>P. helioscopus</i> | <i>P. helioscopus</i> | <b>he4</b> | ZMMU R-12155-1 | Kazakhstan, Aktyubinsk, Northern Ust-Urt, Ozektyk                   | 45.58  | 57.27  | [19] |
| JF769408 | <i>P. helioscopus</i> | <i>P. helioscopus</i> | <b>he4</b> | ZMMU R-12155-2 | Kazakhstan, Aktyubinsk, Northern Ust-Urt, Ozektyk                   | 45.58  | 57.27  | [19] |
| JF769412 | <i>P. helioscopus</i> | <i>P. helioscopus</i> | <b>he4</b> | ZMMU R-12152   | Uzbekistan, Qoraqalpog`iston, Kungrad, SW from Kungrad              | 42.683 | 58.55  | [19] |
| JF769415 | <i>P. helioscopus</i> | <i>P. helioscopus</i> | <b>he4</b> | IZIP 0829      | Uzbekistan, Qoraqalpog`iston, Kungrad, N from Kungrad, near Ravshan | 43.259 | 58.691 | [19] |
| JF769387 | <i>P. helioscopus</i> | <i>P. helioscopus</i> | <b>he5</b> | ZMMU R-12525   | Kazakhstan, Mangistau, Kenderli Kayassanskaya reserve zone          | 42.9   | 53.417 | [19] |
| KF691716 | <i>P. helioscopus</i> | <i>P. helioscopus</i> | <b>he5</b> | ZMMU R-12525-2 | Kazakhstan, Mangistau, Kenderli Kayassanskaya reserve zone          | 42.9   | 53.417 | [12] |
| MK461422 | <i>P. hispidus</i>    | <i>P. hispidus</i>    | <b>hi1</b> | ZMMU R-12531   | Mongolia, Hovd, 12 km SE Bulgan                                     | 46.017 | 91.633 | [15] |
| MK461424 | <i>P. hispidus</i>    | <i>P. hispidus</i>    | <b>hi1</b> | ZMMU R-12533   | Mongolia, Hovd, 8 km N Uench                                        | 46.117 | 92.05  | [15] |
| MK461425 | <i>P. hispidus</i>    | <i>P. hispidus</i>    | <b>hi1</b> | ZMMU R-12529   | Mongolia, Junggar Gobi, Hovd, 18 km N Altay                         | 45.883 | 92.433 | [15] |

|          |                    |                    |            |                |                                                                                                                                        |        |         |      |
|----------|--------------------|--------------------|------------|----------------|----------------------------------------------------------------------------------------------------------------------------------------|--------|---------|------|
| MK461430 | <i>P. hispidus</i> | <i>P. hispidus</i> | <b>hi1</b> | ZMMU R-12532   | Mongolia, Hovd, 4 km SE Bulgan                                                                                                         | 46.067 | 91.6    | [15] |
| MK461461 | <i>P. hispidus</i> | <i>P. hispidus</i> | <b>hi1</b> | ZMMU R-12818   | Mongolia, Hovd, Junggaria, 58 km SE from Altay-somon, Sertengiyn-Chuvch foothills                                                      | 45.65  | 92.983  | [15] |
| MK461465 | <i>P. hispidus</i> | <i>P. hispidus</i> | <b>hi2</b> | ZMMU R-12833   | Mongolia, Bayanhongor, Zaaltayskaya Gobi, Ingen-Khovriyn-Kholoy desert, Nogon-Tzav Rd.                                                 | 43.633 | 99.15   | [15] |
| KF691732 | <i>P. hispidus</i> | <i>P. hispidus</i> | <b>hi3</b> | ZMMU R-12837   | Mongolia, Umnegov, Zaaltayskaya Gobi, 90 km E from fruit farm in Echiyn-Gol Rd., Sertengiyn-Bosgo Rd. on the W from Tost-Uul mountains | 43.217 | 100.067 | [12] |
| MK461462 | <i>P. hispidus</i> | <i>P. hispidus</i> | <b>hi3</b> | ZMMU R-12828   | Mongolia, Bayanhongor, Zaaltayskaya Gobi, 1 km S from fruit farm in Echiyn-Gol Rd.                                                     | 43.233 | 99      | [15] |
| MK461464 | <i>P. hispidus</i> | <i>P. hispidus</i> | <b>hi4</b> | ZMMU R-12835   | Mongolia, Bayanhongor, Zaaltayskaya Gobi, 25 km E from fruit farm in Echiyn-Gol Rd., E foothills of Chutzin-Chara-Uul mountains        | 43.2   | 99.3    | [15] |
| MK461423 | <i>P. hispidus</i> | <i>P. hispidus</i> | <b>hi4</b> | ZMMU R-12530   | Mongolia, Govi-Altay, 39 km SE Bayan-Toroy                                                                                             | 44.883 | 96.917  | [19] |
| MK461463 | <i>P. hispidus</i> | <i>P. hispidus</i> | <b>hi4</b> | ZMMU R-12827   | Mongolia, Bayanhongor, Zaaltayskaya Gobi, 35 km N from fruit farm in Echiyn-Gol Rd., 15 km S from Nogon-Tzav Rd.                       | 43.483 | 99.117  | [15] |
| GU657525 | <i>P. horvathi</i> | <i>P. horvathi</i> | <b>ho</b>  | ZMMU R-13243-2 | Armenia, near Gorovan                                                                                                                  | 39.917 | 44.733  | [19] |
| GU657526 | <i>P. horvathi</i> | <i>P. horvathi</i> | <b>ho</b>  | ZMMU R-13243-1 | Armenia, near Gorovan                                                                                                                  | 39.917 | 44.733  | [19] |
| GU657527 | <i>P. horvathi</i> | <i>P. horvathi</i> | <b>ho</b>  | ZMMU R-13243-3 | Armenia, near Gorovan                                                                                                                  | 39.917 | 44.733  | [19] |
| GU657528 | <i>P. horvathi</i> | <i>P. horvathi</i> | <b>ho</b>  | ZMMU R-13243-4 | Armenia, near Gorovan                                                                                                                  | 39.917 | 44.733  | [19] |

|          |                    |                    |            |                |                                                                                                            |        |        |      |
|----------|--------------------|--------------------|------------|----------------|------------------------------------------------------------------------------------------------------------|--------|--------|------|
| JF769417 | <i>P. horvathi</i> | <i>P. horvathi</i> | <b>ho</b>  | ZMMU R-3843-1  | Armenia, Ararat, Ararat, Sands near Vedi [vicinity of the type locality of <i>horvathi</i> ]               | 39.933 | 44.717 | [19] |
| JF769418 | <i>P. horvathi</i> | <i>P. horvathi</i> | <b>ho</b>  | TLT-200602     | Armenia, Armavir                                                                                           | 40.067 | 44.05  | [19] |
| JF769419 | <i>P. horvathi</i> | <i>P. horvathi</i> | <b>ho</b>  | TLT-200601     | Armenia, Armavir                                                                                           | 40.067 | 44.05  | [19] |
| JF769420 | <i>P. horvathi</i> | <i>P. horvathi</i> | <b>ho</b>  | ZMMU R-12322-1 | Armenia, Armavir (Oktemberyan), 1 km SE Khandzan                                                           | 40.15  | 44.033 | [19] |
| KF691715 | <i>P. horvathi</i> | <i>P. horvathi</i> | <b>ho</b>  | ZMMU R-12322-2 | Armenia, Armavir (Oktemberyan), 1 km SE Khandzan                                                           | 40.15  | 44.033 | [12] |
| MK461441 | <i>P. incertus</i> | <i>P. incertus</i> | <b>in1</b> | ZMMU R-13086-1 | Kazakhstan, Altin-Emel`                                                                                    | 43.972 | 78.639 | [13] |
| MK461442 | <i>P. incertus</i> | <i>P. incertus</i> | <b>in1</b> | ZMMU R-13086-2 | Kazakhstan, Altin-Emel`                                                                                    | 43.972 | 78.639 | [13] |
| MK461443 | <i>P. incertus</i> | <i>P. incertus</i> | <b>in1</b> | ZMMU R-13086-3 | Kazakhstan, Altin-Emel`                                                                                    | 43.972 | 78.639 | [13] |
| MK461444 | <i>P. incertus</i> | <i>P. incertus</i> | <b>in1</b> | ZMMU R-13086-4 | Kazakhstan, Altin-Emel`                                                                                    | 43.972 | 78.639 | [13] |
| MK461453 | <i>P. incertus</i> | <i>P. incertus</i> | <b>in1</b> | ZMMU R-12769   | Kazakhstan, Almaty, right board of Kapchagay reservoir [vicinity of the type locality of <i>incertus</i> ] | 43.883 | 77.7   | [13] |
| KF691728 | <i>P. incertus</i> | <i>P. incertus</i> | <b>in2</b> | ZMMU R-13088-1 | Kazakhstan                                                                                                 | 46.68  | 75.45  | [12] |
| MK461447 | <i>P. incertus</i> | <i>P. incertus</i> | <b>in2</b> | ZMMU R-13088-2 | Kazakhstan                                                                                                 | 46.68  | 75.45  | [13] |
| MK461448 | <i>P. incertus</i> | <i>P. incertus</i> | <b>in2</b> | ZMMU R-13088-3 | Kazakhstan                                                                                                 | 46.68  | 75.45  | [13] |
| MK461373 | <i>P. incertus</i> | <i>P. incertus</i> | <b>in3</b> | ZMMU R-12179   | Kazakhstan, Aktau mts., Kyzyl-Murun                                                                        | 44     | 79.294 | [13] |
| MK461409 | <i>P. incertus</i> | <i>P. incertus</i> | <b>in4</b> | ZMMU R-12333-1 | Kazakhstan, Kyzylkum sand desert, near Chorgos River                                                       | 43.464 | 78.915 | [13] |
| MK461457 | <i>P. incertus</i> | <i>P. incertus</i> | <b>in4</b> | ZMMU R-12674   | Kazakhstan, Almaty, Ili Depression, E Karakum sands, 10 km W from Usek Lake                                | 43.883 | 80.183 | [13] |
| MK461458 | <i>P. incertus</i> | <i>P. incertus</i> | <b>in5</b> | ZMMU R-12673   | Kazakhstan, Taldy-Kurgan, Ili Depression, W Meinykum sands, 5 km N from Nizhniy Pidzhim                    | 44.15  | 80.217 | [13] |
| MK461459 | <i>P. incertus</i> | <i>P. incertus</i> | <b>in5</b> | ZMMU R-12671   | Kazakhstan, Taldy-Kurgan, Ili Depression, sands on the right side of Zharkent Khorgos route                | 44.217 | 80.25  | [13] |



|          |                           |                           |            |                |                                                                                                            |        |        |                   |
|----------|---------------------------|---------------------------|------------|----------------|------------------------------------------------------------------------------------------------------------|--------|--------|-------------------|
| MK461418 | <i>P. interscapularis</i> | <i>P. interscapularis</i> | <b>it1</b> | ZMMU R-12260-1 | Uzbekistan, Navoi, Yamankum Desert, 3 - 4 W from Aktakyr                                                   | 41.736 | 64.023 | <i>this study</i> |
| MK461415 | <i>P. interscapularis</i> | <i>P. interscapularis</i> | <b>it1</b> | ZMMU R-12277-1 | Uzbekistan, Bukhara, 30.5 km NE from Kyzylarvat [vicinity of the type locality of <i>interscapularis</i> ] | 40.698 | 62.448 | <i>this study</i> |
| MK461472 | <i>P. interscapularis</i> | <i>P. interscapularis</i> | <b>it1</b> | 105int3        | Uzbekistan, Kyzylkum sands, 47 km N Uzunkuduk                                                              | 41.53  | 63.22  | <i>this study</i> |
| MK461417 | <i>P. interscapularis</i> | <i>P. interscapularis</i> | <b>it1</b> | ZMMU R-12254-1 | Uzbekistan, Navoi, 5 km NW Terankuduk                                                                      | 40.871 | 65.394 | <i>this study</i> |
| MK461473 | <i>P. interscapularis</i> | <i>P. interscapularis</i> | <b>it1</b> | 105int4        | Uzbekistan, Kyzylkum sands, 47 km N Uzunkuduk                                                              | 41.53  | 63.22  | <i>this study</i> |
| MK461390 | <i>P. interscapularis</i> | <i>P. interscapularis</i> | <b>it1</b> | ZMMU R-12148   | Uzbekistan, Qoraqalpog'iston, Central Kyzylkum, Tamdy                                                      | 41.75  | 64.62  | <i>this study</i> |
| MK461363 | <i>P. interscapularis</i> | <i>P. interscapularis</i> | <b>it2</b> | ZMMU R-12145   | Uzbekistan, Tasmankul Lake                                                                                 | 43.133 | 59.567 | <i>this study</i> |
| MK461387 | <i>P. interscapularis</i> | <i>P. interscapularis</i> | <b>it2</b> | ZMMU R-12144   | Uzbekistan, Qoraqalpog'iston, Mynbklak valley, Minbulan (Minbulak)                                         | 42.25  | 62.86  | <i>this study</i> |
| KF691704 | <i>P. interscapularis</i> | <i>P. interscapularis</i> | <b>it3</b> | ZMMU R-12268   | Uzbekistan, Qoraqalpog'iston, near Chukurkak                                                               | 42.649 | 61.554 | [12]              |
| MK461370 | <i>P. interscapularis</i> | <i>P. interscapularis</i> | <b>it4</b> | ZMMU R-12147   | Uzbekistan, Sands near Zafar                                                                               | 40.99  | 68.88  | <i>this study</i> |
| MK461371 | <i>P. interscapularis</i> | <i>P. interscapularis</i> | <b>it4</b> | ZMMU R-12143-1 | Uzbekistan, Qoraqalpog'iston, Ravshan (Raushan)                                                            | 42.93  | 59.13  | <i>this study</i> |
| MK461372 | <i>P. interscapularis</i> | <i>P. interscapularis</i> | <b>it4</b> | ZMMU R-12143-2 | Uzbekistan, Qoraqalpog'iston, Ravshan (Raushan)                                                            | 42.93  | 59.13  | <i>this study</i> |
| KF691714 | <i>P. khorasanus</i>      | <i>P. khorasanus</i>      | <b>kh</b>  | ZMMU R-13009-2 | Iran, Khorasan, Boshruyeh                                                                                  | 33.9   | 57.5   | [12]              |
| MF567974 | <i>P. khorasanus</i>      | <i>P. khorasanus</i>      | <b>kh</b>  | ZMMU R-13169   | Iran, Khorasan Razavi, Gonabad [type locality of <i>khorasanus</i> ]                                       | 34.58  | 58.8   | [21]              |
| MF567975 | <i>P. khorasanus</i>      | <i>P. khorasanus</i>      | <b>kh</b>  | ZMMU R-11913   | Iran, Khorasan Razavi, Gonabad                                                                             | 34.58  | 58.8   | [21]              |
| MF567983 | <i>P. khorasanus</i>      | <i>P. khorasanus</i>      | <b>kh</b>  | ZMMU R-12202   | Iran, Khorasan Razavi, Gonabad                                                                             | 34.36  | 58.44  | [21]              |
| MF567987 | <i>P. khorasanus</i>      | <i>P. khorasanus</i>      | <b>kh</b>  | ZMMU R-13011-1 | Iran, Khorasan Razavi, Gonabad                                                                             | 34.58  | 58.8   | [21]              |
| MF567988 | <i>P. khorasanus</i>      | <i>P. khorasanus</i>      | <b>kh</b>  | ZMMU R-13011-2 | Iran, Khorasan Razavi, Gonabad                                                                             | 34.58  | 58.8   | [21]              |
| MF567989 | <i>P. khorasanus</i>      | <i>P. khorasanus</i>      | <b>kh</b>  | ZMMU R-13009-1 | Iran, Khorasan, Boshruyeh                                                                                  | 33.9   | 57.5   | [21]              |

|                       |                            |                            |            |                |                                                                                                   |        |        |      |
|-----------------------|----------------------------|----------------------------|------------|----------------|---------------------------------------------------------------------------------------------------|--------|--------|------|
| MK461429              | <i>P. kulagini</i>         | <i>P. kulagini</i>         | <b>ku1</b> | ZMMU R-12534   | Mongolia, 22 km NE Sharga                                                                         | 46.3   | 95.55  | [15] |
| MK461467              | <i>P. kulagini</i>         | <i>P. kulagini</i>         | <b>ku1</b> | ZMMU R-12830   | Mongolia, Govi-Altay, SE Shargyn-Gobi, 3 km S from Olon-Bulag                                     | 46.067 | 95.65  | [15] |
| MK461468              | <i>P. kulagini</i>         | <i>P. kulagini</i>         | <b>ku1</b> | ZMMU R-12829   | Mongolia, Govi-Altay, S Shargyn-Gobi, 40 km E from Tugreg-somon, near Tzachir-Chuduk              | 45.983 | 95.4   | [15] |
| MK461388              | <i>P. kulagini</i>         | <i>P. kulagini</i>         | <b>ku1</b> | ZMMU R-12182-1 | Mongolia, Shargyn-Gobi, 30 km S from Somon Sharga, Ikh Berkh Tolgoim Mt.                          | 46.25  | 95.28  | [15] |
| MK461389              | <i>P. kulagini</i>         | <i>P. kulagini</i>         | <b>ku1</b> | ZMMU R-12182-2 | Mongolia, Shargyn-Gobi, 30 km S from Somon Sharga, Ikh Berkh Tolgoim Mt.                          | 46.25  | 95.28  | [15] |
| KF691735              | <i>P. kulagini</i>         | <i>P. kulagini</i>         | <b>ku2</b> | ZMMU R-12939-2 | Russia, Tyva, Tes-Khem, Ubsu-Nur Depression, Tzuger-els sands [type locality of <i>kulagini</i> ] | 50.65  | 93.25  | [12] |
| MK461470              | <i>P. kulagini</i>         | <i>P. kulagini</i>         | <b>ku2</b> | ZMMU R-12939-1 | Russia, Tyva, Tes-Khem, Ubsu-Nur Depression, Tzuger-els sands                                     | 50.65  | 93.25  | [15] |
| MK461437              | <i>P. kulagini</i>         | <i>P. kulagini</i>         | <b>ku2</b> | ZMMU R-12978-1 | Russia, Tyva, Erzinskyi raion, Tsagan-Tolgoi                                                      | 50.01  | 95.42  | [15] |
| MK461438              | <i>P. kulagini</i>         | <i>P. kulagini</i>         | <b>ku2</b> | ZMMU R-12978-2 | Russia, Tyva, Erzinskyi raion, Tsagan-Tolgoi                                                      | 50.01  | 95.42  | [15] |
| MK461439              | <i>P. kulagini</i>         | <i>P. kulagini</i>         | <b>ku2</b> | ZMMU R-12979-1 | Russia, Tyva, Tes-Hemenskyi raion, Shara-Nur Lake                                                 | 50.22  | 94.52  | [15] |
| MK461440              | <i>P. kulagini</i>         | <i>P. kulagini</i>         | <b>ku2</b> | ZMMU R-12979-2 | Russia, Tyva, Tes-Hemenskyi raion, Shara-Nur Lake                                                 | 50.22  | 94.52  | [15] |
| MK461436              | <i>P. kulagini</i>         | <i>P. kulagini</i>         | <b>ku3</b> | ZMMU R-12977-1 | Russia, Tyva, Erzinskyi raion, Tora-Kholv Lake                                                    | 50.01  | 95.03  | [15] |
| MK461358              | <i>P. kuschakewitschii</i> | <i>P. kuschakewitschii</i> | <b>ks1</b> | ZMMU R-12176-2 | Kazakhstan, Kyzyl-Agach                                                                           | 45.37  | 78.73  | [15] |
| MK461359              | <i>P. kuschakewitschii</i> | <i>P. kuschakewitschii</i> | <b>ks1</b> | ZMMU R-12176-1 | Kazakhstan, Kyzyl-Agach                                                                           | 45.37  | 78.73  | [15] |
| KP279760/NC<br>029186 | <i>P. albolineatus</i>     | <i>P. kuschakewitschii</i> | <b>ks2</b> | no voucher     | China, Xinjiang, Tachen                                                                           | 46.696 | 82.739 | [23] |

|          |                                |                            |             |              |                                                                                                                                                   |       |       |                   |
|----------|--------------------------------|----------------------------|-------------|--------------|---------------------------------------------------------------------------------------------------------------------------------------------------|-------|-------|-------------------|
| KF691727 | <i>P. kuschakewitschii</i>     | <i>P. kuschakewitschii</i> | <b>ks3</b>  | ZMMU R-12173 | Kazakhstan, southern edge of sands near the confluence of Shagantogai and Emel rivers [vicinity of the type locality of <i>kuschakewitschii</i> ] | 46.26 | 82.21 | [12]              |
| MK461395 | <i>P. kuschakewitschii</i>     | <i>P. kuschakewitschii</i> | <b>ks3</b>  | ZMMU R-12173 | Kazakhstan, southern edge of sands near the confluence of Shagantogai and Emel rivers                                                             | 46.26 | 82.21 | [13]              |
| MK461362 | <i>P. kuschakewitschii</i>     | <i>P. kuschakewitschii</i> | <b>ks4</b>  | ZMMU R-12171 | Kazakhstan, Zharbulak                                                                                                                             | 46.16 | 82.13 | [13]              |
| KJ551842 | <i>P. theobaldi orientalis</i> | <i>P. lhasaensis</i>       | <b>lh</b>   | no voucher   | China, Tibet, Xizang, environs of Rutog [vicinity of the type locality of <i>lhasaensis</i> ]                                                     | 33.68 | 80.31 | [25]              |
| KF691737 | <i>P. longicaudatus</i>        | <i>P. longicaudatus</i>    | <b>lo1</b>  | ZMMU R-13899 | Oman, 40 km NE Filim                                                                                                                              | 20.98 | 57.78 | [12]              |
| KT182066 | <i>P. longicaudatus</i>        | <i>P. longicaudatus</i>    | <b>lo1</b>  | ZISP 28777   | Oman, no exact locality                                                                                                                           | -     | -     | [18]              |
| MW940424 | <i>P. longicaudatus</i>        | <i>P. longicaudatus</i>    | <b>lo2</b>  | ERP 5755     | Iraq, Al Naseriyah province                                                                                                                       | -     | -     | [87]              |
| MW940425 | <i>P. longicaudatus</i>        | <i>P. longicaudatus</i>    | <b>lo2</b>  | ERP 5756     | Iraq, Al Naseriyah province                                                                                                                       | -     | -     | [87]              |
| OP970517 | <i>P. lutensis</i>             | <i>P. lutensis</i>         | <b>lu6</b>  | RAN_4305     | Iran, Dash-e Lut [type locality of <i>lutensis</i> ]                                                                                              | 30.45 | 59.35 | <i>this study</i> |
| OP970516 | <i>P. lutensis</i>             | <i>P. lutensis</i>         | <b>lu1</b>  | no voucher   | Iran, Dash-e Lut                                                                                                                                  | 30.45 | 59.35 | <i>this study</i> |
| MW940421 | <i>P. lutensis</i>             | <i>P. lutensis</i>         | <b>lu3</b>  | ERP 6498     | Pakistan- Nushki                                                                                                                                  | -     | -     | [87]              |
| MW940422 | <i>P. lutensis</i>             | <i>P. lutensis</i>         | <b>lu4</b>  | ERP 6499     | Pakistan- Nushki                                                                                                                                  | -     | -     | [87]              |
| MW940423 | <i>P. lutensis</i>             | <i>P. lutensis</i>         | <b>lu2</b>  | ERP 6501     | Pakistan- Nushki                                                                                                                                  | -     | -     | [87]              |
| MW940443 | <i>P. lutensis</i>             | <i>P. lutensis</i>         | <b>lu9</b>  | ERP 6485     | Iran, Kerman province, Rige Yalan                                                                                                                 | 34.92 | 52.25 | [87]              |
| MW940444 | <i>P. lutensis</i>             | <i>P. lutensis</i>         | <b>lu7</b>  | ERP 6486     | Iran, Kerman province, Rige Yalan                                                                                                                 | 34.92 | 52.25 | [87]              |
| MW940445 | <i>P. lutensis</i>             | <i>P. lutensis</i>         | <b>lu8</b>  | ERP 6487     | Iran, Kerman province, Rige Yalan                                                                                                                 | 34.92 | 52.25 | [87]              |
| MW940446 | <i>P. lutensis</i>             | <i>P. lutensis</i>         | <b>lu5</b>  | ERP 6488     | Iran, Kerman province, Rige Yalan                                                                                                                 | 34.92 | 52.25 | [87]              |
| KT182065 | <i>P. maculatus</i>            | <i>P. maculatus</i>        | <b>ma1</b>  | ZISP 28776   | Iran, no exact locality                                                                                                                           | -     | -     | [18]              |
| MW940408 | <i>P. maculatus</i>            | <i>P. maculatus</i>        | <b>ma10</b> | ERP 4408     | Iran, Maranjab                                                                                                                                    | -     | -     | [87]              |
| MW940410 | <i>P. maculatus</i>            | <i>P. maculatus</i>        | <b>ma10</b> | ERP 4693     | Iran, IsfahanIsfahan province, Kashan                                                                                                             | -     | -     | [87]              |
| MW940415 | <i>P. maculatus</i>            | <i>P. maculatus</i>        | <b>ma10</b> | ERP 5428     | Iran, Qom province, Qom                                                                                                                           | -     | -     | [87]              |
| MW940405 | <i>P. maculatus</i>            | <i>P. maculatus</i>        | <b>ma11</b> | ERP 1937     | Iran, Yazd province                                                                                                                               | 32.05 | 54.2  | [87]              |
| MW940409 | <i>P. maculatus</i>            | <i>P. maculatus</i>        | <b>ma11</b> | ERP 4409     | Iran, Kavire Lut                                                                                                                                  | -     | -     | [87]              |
| MW940412 | <i>P. maculatus</i>            | <i>P. maculatus</i>        | <b>ma11</b> | ERP 4969     | Iran, Yazd province, Dareh Anjir                                                                                                                  | 32.56 | 54.95 | [87]              |
| MW940407 | <i>P. maculatus</i>            | <i>P. maculatus</i>        | <b>ma12</b> | ERP 4407     | Iran, Yazd province, Yazd                                                                                                                         | -     | -     | [87]              |

|          |                     |                     |             |                |                                                                                 |         |         |                   |
|----------|---------------------|---------------------|-------------|----------------|---------------------------------------------------------------------------------|---------|---------|-------------------|
| MW940411 | <i>P. maculatus</i> | <i>P. maculatus</i> | <b>ma12</b> | ERP 4941       | Iran, Isfahan province, Anarak to Khor                                          | 33.65   | 54.42   | [87]              |
| MW940419 | <i>P. maculatus</i> | <i>P. maculatus</i> | <b>ma12</b> | ERP 6000       | Iran, South Khorasan-Nehbandan                                                  | 30.9366 | 60.0725 | [87]              |
| MW940427 | <i>P. maculatus</i> | <i>P. maculatus</i> | <b>ma12</b> | ERP 7301       | Iran, Isfahan province, Near Chupanan                                           | -       | -       | [87]              |
| MW940413 | <i>P. maculatus</i> | <i>P. maculatus</i> | <b>ma13</b> | ERP 5426       | Iran, Qom province, Qom                                                         | -       | -       | [87]              |
| MW940414 | <i>P. maculatus</i> | <i>P. maculatus</i> | <b>ma14</b> | ERP 5427       | Iran, Qom province, Qom                                                         | -       | -       | [87]              |
| MW940420 | <i>P. maculatus</i> | <i>P. maculatus</i> | <b>ma15</b> | ERP 6121       | Iran, Isfahan province, AranoBidgol                                             | -       | -       | [87]              |
| MW940426 | <i>P. maculatus</i> | <i>P. maculatus</i> | <b>ma16</b> | ERP 7300       | Iran, Isfahan province, Near Chupanan                                           | -       | -       | [87]              |
| MW940428 | <i>P. maculatus</i> | <i>P. maculatus</i> | <b>ma17</b> | ERP 8723       | Iran, South Khorasan province                                                   | -       | -       | [87]              |
| MW940440 | <i>P. maculatus</i> | <i>P. maculatus</i> | <b>ma18</b> | ERP 8801       | Iran, Kerman province, Sirjan                                                   | 29.446  | 55.48   | [87]              |
| KF691707 | <i>P. maculatus</i> | <i>P. maculatus</i> | <b>ma2</b>  | ZMMU R-13029   | Iran, Isfahan, Chupanan                                                         | 33.52   | 54.25   | [12]              |
| MK461433 | <i>P. maculatus</i> | <i>P. maculatus</i> | <b>ma2</b>  | ZMMU R-13028-3 | Iran, Isfahan, Mesr                                                             | 34.03   | 54.9    | <i>this study</i> |
| MK461398 | <i>P. maculatus</i> | <i>P. maculatus</i> | <b>ma2</b>  | ZMMU R-12206-1 | Iran, Khorasan, Dev-e Salm [vicinity of the type locality of <i>maculatus</i> ] | 31.517  | 59.333  | <i>this study</i> |
| MK461399 | <i>P. maculatus</i> | <i>P. maculatus</i> | <b>ma2</b>  | ZMMU R-12206-2 | Iran, Khorasan, Dev-e Salm                                                      | 31.517  | 59.333  | <i>this study</i> |
| MK461421 | <i>P. maculatus</i> | <i>P. maculatus</i> | <b>ma2</b>  | ZMMU R-12206-1 | Iran, Khorasan, near Deh-e Salm                                                 | 31.2    | 59.317  | <i>this study</i> |
| MK461431 | <i>P. maculatus</i> | <i>P. maculatus</i> | <b>ma2</b>  | ZMMU R-13028-1 | Iran, Isfahan, Mesr                                                             | 34.03   | 54.9    | <i>this study</i> |
| MK461432 | <i>P. maculatus</i> | <i>P. maculatus</i> | <b>ma2</b>  | ZMMU R-13028-2 | Iran, Isfahan, Mesr                                                             | 34.03   | 54.9    | <i>this study</i> |
| MW940430 | <i>P. maculatus</i> | <i>P. maculatus</i> | <b>ma3</b>  | ERP 8786       | Iran, Kerman province, Rafsanjan                                                | 30.721  | 55.96   | [87]              |
| MW940431 | <i>P. maculatus</i> | <i>P. maculatus</i> | <b>ma3</b>  | ERP 8787       | Iran, Kerman province, Rafsanjan                                                | 30.721  | 55.96   | [87]              |
| MW940432 | <i>P. maculatus</i> | <i>P. maculatus</i> | <b>ma3</b>  | ERP 8788       | Iran, Kerman province, Rafsanjan                                                | 30.721  | 55.96   | [87]              |
| MW940433 | <i>P. maculatus</i> | <i>P. maculatus</i> | <b>ma3</b>  | ERP 8789       | Iran, Kerman province, Rafsanjan                                                | 30.721  | 55.96   | [87]              |
| MW940434 | <i>P. maculatus</i> | <i>P. maculatus</i> | <b>ma3</b>  | ERP 8790       | Iran, Kerman province, Rafsanjan                                                | 30.721  | 55.96   | [87]              |
| MW940435 | <i>P. maculatus</i> | <i>P. maculatus</i> | <b>ma3</b>  | ERP 8791       | Iran, Kerman province, Rafsanjan                                                | 30.721  | 55.96   | [87]              |
| MW940401 | <i>P. maculatus</i> | <i>P. maculatus</i> | <b>ma4</b>  | ERP 681        | Iran, Khorasan province, Eshgh abad                                             | -       | -       | [87]              |
| MW940404 | <i>P. maculatus</i> | <i>P. maculatus</i> | <b>ma4</b>  | ERP 1740       | Iran, Isfahan province, Khor                                                    | 33.75   | 55.94   | [87]              |
| MW940406 | <i>P. maculatus</i> | <i>P. maculatus</i> | <b>ma5</b>  | ERP 4406       | Iran, Yazd province, Yazd                                                       | -       | -       | [87]              |
| MW940402 | <i>P. maculatus</i> | <i>P. maculatus</i> | <b>ma6</b>  | ERP 1591       | Iran, Semnan province, parke melli Kavir                                        | 34.92   | 52.25   | [87]              |

|          |                                        |                                        |            |                   |                                                                                                                                                     |         |         |      |
|----------|----------------------------------------|----------------------------------------|------------|-------------------|-----------------------------------------------------------------------------------------------------------------------------------------------------|---------|---------|------|
| MW940403 | <i>P. maculatus</i>                    | <i>P. maculatus</i>                    | <b>ma7</b> | ERP 1592          | Iran, Semnan province, parke melli Kavir                                                                                                            | 34.92   | 52.25   | [87] |
| MW940416 | <i>P. maculatus</i>                    | <i>P. maculatus</i>                    | <b>ma8</b> | ERP 5995          | Iran, South Khorasan-Nehbandan                                                                                                                      | 31.1871 | 59.2395 | [87] |
| MW940417 | <i>P. maculatus</i>                    | <i>P. maculatus</i>                    | <b>ma9</b> | ERP 5996          | Iran, South Khorasan-Nehbandan                                                                                                                      | 31.1871 | 59.2395 | [87] |
| MW940418 | <i>P. maculatus</i>                    | <i>P. maculatus</i>                    | <b>ma9</b> | ERP 5999          | Iran, South Khorasan-Nehbandan                                                                                                                      | 30.9366 | 60.0725 | [87] |
| KF691725 | <i>P. melanurus</i>                    | <i>P. melanurus</i>                    | <b>me1</b> | ZMMU R-12332      | Kazakhstan, East Kazakhstan, west bank of Buchtarma Reservoir, near Kyzylkum                                                                        | 48.839  | 83.431  | [12] |
| MK461427 | <i>P. melanurus</i>                    | <i>P. melanurus</i>                    | <b>me1</b> | ZMMU R-12510      | W bank of Boukhtorma artificial water-basin                                                                                                         | 48.839  | 83.431  | [13] |
| MK461377 | <i>P. melanurus</i>                    | <i>P. melanurus</i>                    | <b>me2</b> | 087-1, no voucher | Kazakhstan, Aigyrkun Sands                                                                                                                          | 47.64   | 85.23   | [13] |
| MK461378 | <i>P. melanurus</i>                    | <i>P. melanurus</i>                    | <b>me2</b> | 087-2, no voucher | Kazakhstan, Chernyi Irtysh river                                                                                                                    | 47.9    | 85.01   | [13] |
| MK461426 | <i>P. melanurus</i>                    | <i>P. melanurus</i>                    | <b>me2</b> | ZMMU R-12509      | Kazakhstan, Zaisan settl. [vicinity of the type locality of <i>melanurus</i> ]                                                                      | 47.656  | 85.548  | [13] |
| MK461452 | <i>P. melanurus</i>                    | <i>P. melanurus</i>                    | <b>me2</b> | ZMMU R-12767      | Kazakhstan, Taldy-Kurgan, Karatal river                                                                                                             | 45.667  | 77.25   | [13] |
| JF769376 | <i>P. meridionalis</i>                 | <i>P. meridionalis</i>                 | <b>mr1</b> | ZMMU R-12803      | Uzbekistan, Bukhara, near Kagan town, Dzheyran farm                                                                                                 | 39.567  | 64.7    | [19] |
| JF769377 | <i>P. meridionalis</i>                 | <i>P. meridionalis</i>                 | <b>mr2</b> | ZMMU R-12801-1    | Uzbekistan, Surkhandaria, N from Aktash, in Pashchurt's direction [type locality of <i>meridionalis</i> ]                                           | 37.583  | 66.667  | [19] |
| MK461455 | <i>P. moltschanovi</i>                 | <i>P. moltschanovi</i>                 | <b>mo1</b> | ZMMU R-12776      | Kazakhstan, Kzyl-Orda, Aralsk town                                                                                                                  | 45.883  | 60.317  | [13] |
| KF691730 | <i>P. moltschanovi</i>                 | <i>P. moltschanovi</i>                 | <b>mo2</b> | ZMMU R-12942      | Uzbekistan, Qoraqalpog'iston, Karakalpakia, S from Beltau Hills, 63 km ENE from Takhtakupyr [vicinity of the type locality of <i>moltschanovi</i> ] | 43.333  | 60.917  | [12] |
| MF567980 | <i>P. mystaceus aurantiacocaudatus</i> | <i>P. mystaceus aurantiacocaudatus</i> | <b>my1</b> | ZMMU R-12778      | Kazakhstan, Pidzhim env.                                                                                                                            | 44.2    | 80.183  | [21] |
| MF567984 | <i>P. mystaceus aurantiacocaudatus</i> | <i>P. mystaceus aurantiacocaudatus</i> | <b>my1</b> | ZMMU R-12518-2    | SE Kazakhstan, left bank of Ili River, 125 km of the road Almaty-Bakanas                                                                            | 44.429  | 76.792  | [21] |
| MF567991 | <i>P. mystaceus aurantiacocaudatus</i> | <i>P. mystaceus aurantiacocaudatus</i> | <b>my1</b> | ZMMU R-14715-1    | Kazakhstan, S Balkhash Lake, N of Matay                                                                                                             | 45.989  | 78.843  | [21] |

|          |                                        |                                        |            |                |                                                                                                   |        |        |      |
|----------|----------------------------------------|----------------------------------------|------------|----------------|---------------------------------------------------------------------------------------------------|--------|--------|------|
| MF567992 | <i>P. mystaceus aurantiacocaudatus</i> | <i>P. mystaceus aurantiacocaudatus</i> | <b>my1</b> | ZMMU R-14715-2 | Kazakhstan, S Balkhash Lake, N of Matay                                                           | 45.989 | 78.843 | [21] |
| MF567993 | <i>P. mystaceus aurantiacocaudatus</i> | <i>P. mystaceus aurantiacocaudatus</i> | <b>my1</b> | ZMMU R-14715-3 | Kazakhstan, S Balkhash Lake, N of Matay                                                           | 45.989 | 78.843 | [21] |
| MF567994 | <i>P. mystaceus aurantiacocaudatus</i> | <i>P. mystaceus aurantiacocaudatus</i> | <b>my1</b> | NAP-05510      | Kazakhstan, Kabanbay (Andreevka) env.                                                             | 45.939 | 80.646 | [21] |
| MF567995 | <i>P. mystaceus aurantiacocaudatus</i> | <i>P. mystaceus aurantiacocaudatus</i> | <b>my1</b> | ZMMU R-14715-4 | Kazakhstan, S Balkhash Lake, N of Matay                                                           | 45.989 | 78.843 | [21] |
| MF567972 | <i>P. mystaceus aurantiacocaudatus</i> | <i>P. mystaceus aurantiacocaudatus</i> | <b>my2</b> | ZMMU R-12140-1 | E Kazakhstan, N Kapchagai Reservoir [vicinity of the type locality of <i>aurantiacocaudatus</i> ] | 43.87  | 77.73  | [21] |
| MF567973 | <i>P. mystaceus aurantiacocaudatus</i> | <i>P. mystaceus aurantiacocaudatus</i> | <b>my2</b> | ZMMU R-12140-2 | E Kazakhstan, N Kapchagai Reservoir                                                               | 43.87  | 77.73  | [21] |
| MF567970 | <i>P. mystaceus mystaceus</i>          | <i>P. mystaceus mystaceus</i>          | <b>my3</b> | ZMMU R-12141   | Kazakhstan, N Priaralye, S border of Malye Barsuki sands                                          | 46.96  | 60.19  | [21] |
| MF567985 | <i>P. mystaceus mystaceus</i>          | <i>P. mystaceus mystaceus</i>          | <b>my3</b> | ZMMU R-12517-2 | Kazakhstan, N Priaralye, S border of Malye Barsuki sands                                          | 47.34  | 60.75  | [21] |
| MF567979 | <i>P. mystaceus mystaceus</i>          | <i>P. mystaceus mystaceus</i>          | <b>my4</b> | ZMMU R-12799   | Tajikistan, Shaartuz                                                                              | 36.9   | 67.93  | [21] |
| MF567982 | <i>P. mystaceus mystaceus</i>          | <i>P. mystaceus mystaceus</i>          | <b>my4</b> | ZMMU R-12772   | Kazakhstan, Aralsk                                                                                | 53.88  | 63.327 | [21] |
| MF567968 | <i>P. mystaceus mystaceus</i>          | <i>P. mystaceus mystaceus</i>          | <b>my5</b> | ZMMU R-12149-1 | Russia, Astrakhan, Dosang                                                                         | 46.88  | 47.92  | [21] |
| MF567969 | <i>P. mystaceus mystaceus</i>          | <i>P. mystaceus mystaceus</i>          | <b>my5</b> | ZMMU R-12149-2 | Russia, Astrakhan, Dosang                                                                         | 46.88  | 47.92  | [21] |
| MF567986 | <i>P. mystaceus mystaceus</i>          | <i>P. mystaceus mystaceus</i>          | <b>my5</b> | ZMMU R-12457-3 | Russia, Astrakhan, Dosang                                                                         | 47.16  | 48.25  | [21] |
| MF567977 | <i>P. mystaceus mystaceus</i>          | <i>P. mystaceus mystaceus</i>          | <b>my6</b> | ZMMU R-12252   | Uzbekistan, Navoi, 5 km NW Terankuduk                                                             | 40.87  | 65.39  | [21] |
| KF691713 | <i>P. mystaceus mystaceus</i>          | <i>P. mystaceus mystaceus</i>          | <b>my7</b> | ZMMU R-12261   | Uzbekistan, Navoi, Yamankum Desert, 3 - 4 W from Aktakyr                                          | 41.74  | 64.02  | [21] |
| MF567978 | <i>P. mystaceus mystaceus</i>          | <i>P. mystaceus mystaceus</i>          | <b>my7</b> | ZMMU R-12266   | Uzbekistan, Qarakalpaqiston Republic, Chukurkak                                                   | 42.65  | 61.55  | [21] |
| MF567981 | <i>P. mystaceus mystaceus</i>          | <i>P. mystaceus mystaceus</i>          | <b>my7</b> | ZMMU R-12775   | Uzbekistan, Qarakalpaqiston Republic                                                              | 41.57  | 61.02  | [21] |
| MF567990 | <i>P. mystaceus mystaceus</i>          | <i>P. mystaceus mystaceus</i>          | <b>my7</b> | ZMMU R-12457-2 | Russia, Astrakhan, Dosang                                                                         | 47.16  | 48.25  | [21] |

|          |                                 |                               |            |                     |                                                                                                                        |        |        |                   |
|----------|---------------------------------|-------------------------------|------------|---------------------|------------------------------------------------------------------------------------------------------------------------|--------|--------|-------------------|
| MF567971 | <i>P. mystaceus mystaceus</i>   | <i>P. mystaceus mystaceus</i> | <b>my3</b> | ZMMU R-12141-1      | Kazakhstan, N Priaralye, S border of Malye Barsuki sands                                                               | 46.96  | 60.19  | [21]              |
| MF039061 | <i>P. vlangalii nanschanica</i> | <i>P. nanschanicus</i>        | <b>nn</b>  | -                   | China, Nanshan Mountains, Southern Danghe range, Northern QTP                                                          | 38.97  | 96.06  | [86]              |
| KT182061 | <i>P. nejdensis</i>             | <i>P. nejdensis</i>           | <b>ne</b>  | ZISP 27091          | Jordan, Mudawara                                                                                                       | 29.33  | 36.03  | [18]              |
| KT182062 | <i>P. nejdensis</i>             | <i>P. nejdensis</i>           | <b>ne</b>  | ZISP 26642          | Jordan, Wadi Ram, southern Jordan                                                                                      | 29.47  | 35.39  | [18]              |
| KT182063 | <i>P. nejdensis</i>             | <i>P. nejdensis</i>           | <b>ne</b>  | ZISP 27092          | Jordan, Mudawara                                                                                                       | 29.33  | 36.03  | [18]              |
| KT182064 | <i>P. nejdensis</i>             | <i>P. nejdensis</i>           | <b>ne</b>  | ZISP 26643          | Jordan, Wadi Ram, southern Jordan                                                                                      | 29.47  | 35.39  | [18]              |
| MK461450 | <i>P. ocellatus</i>             | <i>P. ocellatus</i>           | <b>oc1</b> | ZMMU R-12779        | Uzbekistan, Bukhara, 30 km S from Bukhara, near Kagan town, Dzheyran farm                                              | 39.567 | 64.717 | <i>this study</i> |
| MK461479 | <i>P. ocellatus</i>             | <i>P. ocellatus</i>           | <b>oc2</b> | 305oc1              | Uzbekistan, Kyzylkum sands, 36 km N Gazli                                                                              | 40.33  | 63.8   | <i>this study</i> |
| MK461414 | <i>P. ocellatus</i>             | <i>P. ocellatus</i>           | <b>oc3</b> | ZMMU R-12316        | Uzbekistan, Bukhara, 40 km N from Gazli, N border of Karakir Lake [vicinity of the type locality of <i>ocellatus</i> ] | 40.38  | 63.26  | <i>this study</i> |
| MK461480 | <i>P. ocellatus</i>             | <i>P. ocellatus</i>           | <b>oc4</b> | 305oc2              | Uzbekistan, Kyzylkum sands, 36 km N Gazli                                                                              | 40.33  | 63.8   | <i>this study</i> |
| MK461481 | <i>P. ocellatus</i>             | <i>P. ocellatus</i>           | <b>oc4</b> | 305oc3              | Uzbekistan, Kyzylkum sands, 36 km N Gazli                                                                              | 40.33  | 63.8   | <i>this study</i> |
| KJ630904 | <i>P. parvus</i>                | <i>P. parvus</i>              | <b>pa</b>  | no voucher          | China, Qinhai, Tuotuo River (Ulan Moron) [vicinity of the type locality of <i>parvus</i> ]                             | 34.09  | 92.91  | [26]              |
| JF756688 | <i>P. persicus</i>              | <i>P. persicus</i>            | <b>pe</b>  | FH_10_1, no voucher | Iran, Markasi, Arak env.                                                                                               | 34.24  | 49.75  | [19]              |
| KF691722 | <i>P. putjatai</i>              | <i>P. putjatai</i>            | <b>pu1</b> | KIZ 020238          | China, Qinghai, env. of. Qinghai Lake                                                                                  | 36.72  | 100.79 | [12]              |
| MK461411 | <i>P. putjatai</i>              | <i>P. putjatai</i>            | <b>pu1</b> | ZMMU R-12308-1      | China, Qinghai, Qinghay-Tibet table, NE border of Kukunor (Qinghay) Lake                                               | 37.28  | 100.75 | <i>this study</i> |
| MK461404 | <i>P. putjatai</i>              | <i>P. putjatai</i>            | <b>pu1</b> | ZMMU R-12308-1      | China, Qinghai, Qinhai-Tibet plateau, N coast of the Kukunor Lake, N coast of the Kukunor Lake                         | 37.28  | 100.75 | <i>this study</i> |

|          |                       |                      |            |                |                                                                                                                           |       |        |                   |
|----------|-----------------------|----------------------|------------|----------------|---------------------------------------------------------------------------------------------------------------------------|-------|--------|-------------------|
| MK461405 | <i>P. putjatai</i>    | <i>P. putjatai</i>   | <b>pu2</b> | ZMMU R-12308-2 | China, Qinghai, Qinhai-Tibet plateau, N coast of the Kukur Lake, N coast of the Kukur Lake                                | 37.28 | 100.75 | <i>this study</i> |
| KJ830752 | <i>P. putjatai</i>    | <i>P. putjatai</i>   | <b>pu3</b> | -              | China, Nanhai Temple, Guide county, Qinghai Province [type locality of <i>putjatai</i> ]                                  | -     | -      | [147]             |
| KJ885621 | <i>P. guinanensis</i> | <i>P. putjatai</i>   | <b>pu4</b> | -              | China, Guinan county, Qinghai Province [type locality of <i>guinanensis</i> ]                                             | -     | -      | [148]             |
| MK461400 | <i>P. raddei</i>      | <i>P. raddei</i>     | <b>ra</b>  | ZMMU R-4033    | Turkmenistan, Serakhs (Saragt)                                                                                            | 36.53 | 61.21  | <i>this study</i> |
| MK461449 | <i>P. rossikowi</i>   | <i>P. rossikowi</i>  | <b>ro1</b> | ZMMU R-12795   | Turkmenistan, Chardzhou, Dargan-Ata, Lebap                                                                                | 41.05 | 61.87  | <i>this study</i> |
| MG739300 | <i>P. rossikowi</i>   | <i>P. rossikowi</i>  | <b>ro2</b> | ZMMU R-12795   | Turkmenistan, Chardzhou, Dargan-Ata, Lebap                                                                                | 41.05 | 61.87  | [2]               |
| JF769373 | <i>P. saidalievi</i>  | <i>P. saidalievi</i> | <b>sa1</b> | ZMMU R-12802-2 | Uzbekistan, Namangan, Fergana Depression, Pabskaya steppe, near Chodak and Koshmior [type locality of <i>saidalievi</i> ] | 40.88 | 70.8   | [19]              |
| JF769374 | <i>P. saidalievi</i>  | <i>P. saidalievi</i> | <b>sa1</b> | ZMMU R-12802-1 | Uzbekistan, Namangan, Fergana Depression, Pabskaya steppe, near Chodak and Koshmior                                       | 40.88 | 70.8   | [19]              |
| KF691717 | <i>P. saidalievi</i>  | <i>P. saidalievi</i> | <b>sa1</b> | ZMMU R-12802   | Uzbekistan, Namangan, Fergana Depression, Pabskaya steppe, near Chodak and Koshmior                                       | 40.88 | 70.8   | [12]              |
| JF769375 | <i>P. saidalievi</i>  | <i>P. saidalievi</i> | <b>sa2</b> | ZMMU R-12678   | Uzbekistan, Fergana, Fergana Depression, 25 km N from Kokand                                                              | 40.78 | 70.97  | [19]              |
| KT182048 | <i>P. sakoi</i>       | <i>P. sakoi</i>      | <b>sk</b>  | ZISP 28705     | Oman, Al Sharqiyah Sands, Filim vicinity [type locality of <i>sakoi</i> ]                                                 | 20.69 | 58.29  | [18]              |
| KT182049 | <i>P. sakoi</i>       | <i>P. sakoi</i>      | <b>sk</b>  | ZISP 28706     | Oman, Al Sharqiyah Sands, Filim vicinity                                                                                  | 20.69 | 58.29  | [18]              |
| KT182050 | <i>P. sakoi</i>       | <i>P. sakoi</i>      | <b>sk</b>  | ZISP 28710     | Oman, Al Sharqiyah Sands, Filim vicinity                                                                                  | 20.69 | 58.29  | [18]              |



|          |                       |                       |            |                |                                                                                                                                         |        |        |                   |
|----------|-----------------------|-----------------------|------------|----------------|-----------------------------------------------------------------------------------------------------------------------------------------|--------|--------|-------------------|
| KT182051 | <i>P. sakoi</i>       | <i>P. sakoi</i>       | <b>sk</b>  | ZISP 28711     | Oman, Al Sharqiyah Sands, Filim vicinity                                                                                                | 20.689 | 58.295 | [18]              |
| KT182052 | <i>P. sakoi</i>       | <i>P. sakoi</i>       | <b>sk</b>  | ZISP 28712     | Oman, Al Sharqiyah Sands, Filim vicinity                                                                                                | 20.689 | 58.295 | [18]              |
| KT182047 | <i>P. sakoi</i>       | <i>P. sakoi</i>       | <b>sk</b>  | ZISP 27089     | Oman, 50 km from Sur                                                                                                                    | 20.689 | 58.295 | [18]              |
| MK461403 | <i>P. scutellatus</i> | <i>P. scutellatus</i> | <b>sc1</b> | ZMMU R-11891   | Iran, Semnan, Daverabad, 20 km SW Daverabad                                                                                             | 35     | 52.45  | <i>this study</i> |
| KF691712 | <i>P. scutellatus</i> | <i>P. scutellatus</i> | <b>sc2</b> | ZMMU R-13020-3 | Iran, Isfahan, Chupanan [vicinity of the type locality of <i>scutellatus</i> ]                                                          | 33.52  | 54.25  | [12]              |
| MK461445 | <i>P. scutellatus</i> | <i>P. scutellatus</i> | <b>sc2</b> | ZMMU R-13020-1 | Iran, Isfahan, Chupanan                                                                                                                 | 33.52  | 54.25  | <i>this study</i> |
| MK461446 | <i>P. scutellatus</i> | <i>P. scutellatus</i> | <b>sc2</b> | ZMMU R-13020-2 | Iran, Isfahan, Chupanan                                                                                                                 | 33.52  | 54.25  | <i>this study</i> |
| JF769393 | <i>P. sergeevi</i>    | <i>P. sergeevi</i>    | <b>se1</b> | ZMMU R-12264_1 | Uzbekistan, Navoi, SE border TamdyTau Mts., 40 km from Zaravshan, between Tamdybulak and Yangitamdy [type locality of <i>sergeevi</i> ] | 41.702 | 64.033 | [19]              |
| JF769390 | <i>P. sergeevi</i>    | <i>P. sergeevi</i>    | <b>se2</b> | ZMMU R-12310   | Uzbekistan, Bukhara, SW Kyzylkumy, Kuldzhuktau Mts.                                                                                     | 40.783 | 63.483 | [19]              |
| JF769391 | <i>P. sergeevi</i>    | <i>P. sergeevi</i>    | <b>se2</b> | ZMMU R-12286   | Uzbekistan, Bukhara, near Kuldzhuktau Mts. and Dzhangyldy                                                                               | 40.797 | 63.608 | [19]              |
| JF769392 | <i>P. sergeevi</i>    | <i>P. sergeevi</i>    | <b>se2</b> | ZMMU R-12281_1 | Uzbekistan, Bukhara, near Kuldzhuktau Mts. 8 km W from Shuruk, near Desert Botanic Station                                              | 40.729 | 63.756 | [19]              |
| JF769395 | <i>P. sergeevi</i>    | <i>P. sergeevi</i>    | <b>se2</b> | ZMMU R-12167   | Uzbekistan, Qoraqalpog'iston, Central Kyzylkum, 10 km NE from Zarafshan                                                                 | 41.65  | 64.3   | [19]              |
| MK461408 | <i>P. sergeevi</i>    | <i>P. sergeevi</i>    | <b>se2</b> | ZMMU R-12310   | Uzbekistan, SW Kyzylkum, Kuldjuktai                                                                                                     | 40.78  | 63.48  | <i>this study</i> |
| JF769394 | <i>P. sergeevi</i>    | <i>P. sergeevi</i>    | <b>se3</b> | ZMMU R-12259_1 | Uzbekistan, Navoi, Karakata Depression, 60 km NW from Zafarabad                                                                         | 40.931 | 64.654 | [19]              |

|          |                       |                     |            |                |                                                                                                                               |        |        |                   |
|----------|-----------------------|---------------------|------------|----------------|-------------------------------------------------------------------------------------------------------------------------------|--------|--------|-------------------|
| JF769396 | <i>P. sergeevi</i>    | <i>P. sergeevi</i>  | <b>se3</b> | ZMMU R-12166   | Uzbekistan, Bukhara, Bukhara, Ayakagytma Lake environs                                                                        | 40.57  | 64.68  | [19]              |
| KF691705 | <i>P. sogdianus</i>   | <i>P. sogdianus</i> | <b>so1</b> | ZMMU R-12800   | Uzbekistan, Surkhondaryo Viloyati, 10 - 15 km from Dzharkurgan in Termez direction                                            | 37.333 | 67.367 | [12]              |
| MK461416 | <i>P. sogdianus</i>   | <i>P. sogdianus</i> | <b>so1</b> | ZMMU R-12287-1 | Uzbekistan, Surkhondaryo Viloyati, Termez, , 32 km SE from Sherabad and W from Dzharkurgan                                    | 37.514 | 67.373 | <i>this study</i> |
| MK461482 | <i>P. sogdianus</i>   | <i>P. sogdianus</i> | <b>so2</b> | ZMMU R-13396-2 | Tajikistan, Shakh Aktau foothills [vicinity of the type locality of <i>sogdianus</i> ]                                        | 37.313 | 68.292 | <i>this study</i> |
| MK461483 | <i>P. sogdianus</i>   | <i>P. sogdianus</i> | <b>so2</b> | ZMMUR-13396-1  | Tajikistan, Shakh desert, Kurdzhalakum                                                                                        | 37.163 | 68.492 | <i>this study</i> |
| MK461367 | <i>P. strauchi</i>    | <i>P. strauchi</i>  | <b>st1</b> | ZMMU R-11386-2 | Uzbekistan, Fergana, 40 km form Kokand to Nadijan                                                                             | 40.69  | 71.9   | <i>this study</i> |
| MK461451 | <i>P. strauchi</i>    | <i>P. strauchi</i>  | <b>st2</b> | ZMMU R-12785   | Tajikistan, Sughd, Leninabad, Fergana Depression, near Kayrakum reservoir [vicinity of the type locality of <i>strauchi</i> ] | 40.333 | 70.033 | <i>this study</i> |
| MK461391 | <i>P. strauchi</i>    | <i>P. strauchi</i>  | <b>st3</b> | ZMMU R-12142   | Uzbekistan, Fergana, Kokand, Kokand environs                                                                                  | 40.69  | 71.9   | <i>this study</i> |
| KF691711 | <i>P. strauchi</i>    | <i>P. strauchi</i>  | <b>st1</b> | ZMMU R-11386-1 | Uzbekistan, Fergana, 40 km form Kokand to Nadijan                                                                             | 40.69  | 71.9   | [12]              |
| KF691721 | <i>P. theobaldi</i>   | <i>P. theobaldi</i> | <b>th1</b> | ZMMU R-10816   | India, Jammu-and-Kashmir, Ladakh, Rupshu river, Teokar valley [type locality of <i>theobaldi</i> ]                            | 33.01  | 77.99  | [12]              |
| MK461380 | <i>P. theobaldi</i>   | <i>P. theobaldi</i> | <b>th1</b> | ZMMU R-12139-2 | India, Jammu-Kashmir, Ladakh, Rupshu river, Teokar valley                                                                     | 33.01  | 77.99  | <i>this study</i> |
| MK461379 | <i>P. theobaldi</i>   | <i>P. theobaldi</i> | <b>th1</b> | ZMMU R-12139-1 | India, Jammu-Kashmir, Ladakh, Rupshu river, Teokar valley                                                                     | 33.01  | 77.99  | <i>this study</i> |
| MK461376 | <i>P. theobaldi</i>   | <i>P. theobaldi</i> | <b>th1</b> | ZMMU R-12138-1 | India, Jammu-Kashmir, Ladakh                                                                                                  | 33.02  | 77.07  | <i>this study</i> |
| KF691723 | <i>P. theobaldi</i>   | <i>P. theobaldi</i> | <b>th2</b> | ZMMU R-12138-2 | India, Jammu-Kashmir, Ladakh                                                                                                  | 33.02  | 77.07  | [12]              |
| MK461413 | <i>P. scutellatus</i> | <i>P. tickelii</i>  | <b>ti</b>  | ZMMU R-12315   | Iran, Khorasan, near Nechbandan [vicinity of the type locality of <i>tickelii</i> ]                                           | 31.6   | 59.55  | <i>this study</i> |

|          |                       |                          |            |                |                                                                                        |        |         |                   |
|----------|-----------------------|--------------------------|------------|----------------|----------------------------------------------------------------------------------------|--------|---------|-------------------|
| JF769386 | <i>P. turcomanus</i>  | <i>P. turcomanus</i>     | <b>tu</b>  | ZMMU R-12789   | Turkmenistan, Balkan, 70 km SE from Nebit-Dag<br>[type locality of <i>turcomanus</i> ] | 38.967 | 54.917  | [19]              |
| JF769385 | <i>P. varius</i>      | <i>P. varius</i>         | <b>va4</b> | ZMMU R-12810   | Kazakhstan, Taldy-Kurgan, near Baschi and Kalinino                                     | 44.167 | 78.783  | [19]              |
| MK461382 | <i>P. varius</i>      | <i>P. varius</i>         | <b>va3</b> | ZMMU R-12164   | Kazakhstan, Border of Alma-Aty and E Kazakhstan provinces, Lake Zhalanashkol           | 45.4   | 82.09   | <i>this study</i> |
| HQ543966 | <i>P. varius</i>      | <i>P. varius</i>         | <b>va1</b> | ZMMU R-13089_1 | China, Xinjiang, Toli                                                                  | 45.98  | 83.54   | [12]              |
| JF769383 | <i>P. varius</i>      | <i>P. varius</i>         | <b>va2</b> | ZMMU R-12903_2 | Mongolia, Hovd, Ikcher-Toli on the W from Bulgan town                                  | 46.1   | 91.35   | [19]              |
| JF769384 | <i>P. varius</i>      | <i>P. varius</i>         | <b>va2</b> | ZMMU R-12903_1 | Mongolia, Hovd, Ikcher-Toli on the W from Bulgan town                                  | 46.1   | 91.35   | [19]              |
| JF769397 | <i>P. varius</i>      | <i>P. varius</i>         | <b>va2</b> | ZMMU R-12163-1 | Kazakhstan, East Kazakhstan, Semey-Tau Mt., Scherbakovka environs                      | 50.08  | 79.41   | [19]              |
| JF769398 | <i>P. varius</i>      | <i>P. varius</i>         | <b>va2</b> | ZMMU R-12163-2 | Kazakhstan, East Kazakhstan, Semey-Tau Mt., Scherbakovka environs                      | 50.08  | 79.41   | [19]              |
| JF756685 | <i>P. varius</i>      | <i>P. varius</i>         | <b>va3</b> | ZMMU R-12524   | Kazakhstan, Zhalanashkol env.                                                          | 45.571 | 82.212  | [19]              |
| KJ749841 | <i>P. przewalskii</i> | <i>P. p. przewalskii</i> | <b>pr1</b> | -              | China, Inner Mongolia, Alxa League                                                     | 38.833 | 105.667 | [24]              |
| KF691734 | <i>P. przewalskii</i> | <i>P. p. przewalskii</i> | <b>pr2</b> | ZMMU R-8900    | China, Gansu, Lanzhou, university territory                                            | 36.03  | 103.41  | [12]              |
| MK461471 | <i>P. versicolor</i>  | <i>P. p. versicolor</i>  | <b>ve1</b> | ZMMU R-12940   | Mongolia, Umnegov, 8 - 10 km S from Bayan-Dalay somon                                  | 43.383 | 103.45  | [15]              |
| MK461366 | <i>P. versicolor</i>  | <i>P. p. versicolor</i>  | <b>ve1</b> | ZMMU R-12178   | Mongolia                                                                               | 43.75  | 104     | [15]              |
| MK461466 | <i>P. versicolor</i>  | <i>P. p. versicolor</i>  | <b>ve1</b> | ZMMU R-12834   | Mongolia, Bayanhongor, S Changay, 25 - 30 km E from Zhinst-somon                       | 45.55  | 100.267 | [15]              |
| KF691736 | <i>P. versicolor</i>  | <i>P. p. versicolor</i>  | <b>ve2</b> | ZMMU R-12178   | Mongolia, 35 km NW Dalanzadgad                                                         | 43.75  | 104     | [12]              |
| MK461434 | <i>P. vindumi</i>     | <i>P. vindumi</i>        | <b>vi1</b> | ZMMU R-13026-2 | Iran, Khorasan, Gonobad [type locality of <i>vindumi</i> ]                             | 34.76  | 58.78   | <i>this study</i> |

|          |                      |                               |            |                |                                                                                                               |        |        |                   |
|----------|----------------------|-------------------------------|------------|----------------|---------------------------------------------------------------------------------------------------------------|--------|--------|-------------------|
| KF691706 | <i>P. vindumi</i>    | <i>P. vindumi</i>             | <b>vi2</b> | ZMMU R-13026-1 | Iran, Khorasan, Gonobad                                                                                       | 34.76  | 58.78  | [12]              |
| MK461435 | <i>P. vindumi</i>    | <i>P. vindumi</i>             | <b>vi2</b> | ZMMU R-13026-3 | Iran, Khorasan, Gonobad                                                                                       | 34.76  | 58.78  | <i>this study</i> |
| MK461396 | <i>P. vindumi</i>    | <i>P. vindumi</i>             | <b>vi2</b> | ZMMU R-13026   | Iran, Khorasan, 60 km N Gonabad                                                                               | 34.6   | 58.733 | <i>this study</i> |
| MK461420 | <i>P. vindumi</i>    | <i>P. vindumi</i>             | <b>vi2</b> | ZMMU R-12204-1 | Iran, Khorasan, 60 km N Gonobad                                                                               | 34.6   | 58.733 | <i>this study</i> |
| MK461397 | <i>P. vindumi</i>    | <i>P. vindumi</i>             | <b>vi2</b> | ZMMU R-12204   | Iran, Khorasan, 60 km N Gonabad                                                                               | 34.6   | 58.733 | <i>this study</i> |
| MK461419 | <i>P. vindumi</i>    | <i>P. vindumi</i>             | <b>vi2</b> | ZMMU R-12203-1 | Iran, Khorasan, 60 km N Gonobad                                                                               | 34.6   | 58.733 | <i>this study</i> |
| KF691718 | <i>P. erythrurus</i> | <i>P. vlangalii vlangalii</i> | <b>vl1</b> | ZMMU R-12303   | China, Qinghai, environs of Duokake, KunLun Shan (KunLun mt)                                                  | 36.611 | 92.328 | [12]              |
| MK461351 | <i>P. erythrurus</i> | <i>P. vlangalii vlangalii</i> | <b>vl1</b> | ZMMU R-12305-1 | China, Qinghai, environs of Golmud, Burhan Budai Shan                                                         | 36.43  | 94.19  | <i>this study</i> |
| MK461352 | <i>P. erythrurus</i> | <i>P. vlangalii vlangalii</i> | <b>vl1</b> | ZMMU R-12304   | China, Xinjiang Uygur Zizhiqu, Aer Jin Shan N. P., Arijin mt                                                  | 36.985 | 90.834 | <i>this study</i> |
| MK461353 | <i>P. erythrurus</i> | <i>P. vlangalii vlangalii</i> | <b>vl1</b> | ZMMU R-12307   | China, 40 km NW from Tangelashan, Kekexili mt, near Kekexili                                                  | 34.833 | 92.6   | <i>this study</i> |
| MK461354 | <i>P. erythrurus</i> | <i>P. vlangalii vlangalii</i> | <b>vl1</b> | ZMMU R-12306   | China, Qinghai, KunLun Shan Kou, environs of Tibetan plato                                                    | 35.072 | 93.519 | <i>this study</i> |
| MF039058 | <i>P. vlangalii</i>  | <i>P. vlangalii vlangalii</i> | <b>vl2</b> | -              | China, Geermu, Western Qinghai-Xizang (Tibetan) Plateau                                                       | -      | -      | [26]              |
| MK461401 | <i>P. vlangalii</i>  | <i>P. vlangalii pylzowi</i>   | <b>vl3</b> | ZMMU R-8899_1  | China, Xinjiang, Chemo (= Cherchen, Tzemo), Altyntag mts., Chinbulak, 60 km S Tura, Cherchen bank             | 37.9   | 87.7   | <i>this study</i> |
| HM362988 | <i>P. vlangalii</i>  | <i>P. vlangalii pylzowi</i>   | <b>vl4</b> | CIB XM3540     | Ruoergai, Sichuan, China                                                                                      | 33.87  | 102.95 | [149]             |
| KF691719 | <i>P. vlangalii</i>  | <i>P. vlangalii pylzowi</i>   | <b>vl4</b> | KIZ 020062     | China, Qinghai, Gonghe [vicinity of the type locality of <i>vlangalii</i> ]                                   | 35.627 | 99.546 | [12]              |
| MK492321 | <i>P. vlangalii</i>  | <i>P. vlangalii pylzowi</i>   | <b>vl4</b> | ZMMU R-8897_1  | China, Xinjiang, Chemo (= Cherchen, Tzemo), Altyntag mts., Minbulak, left Cherchen bank, Achik-kul Depression | 37.9   | 87.7   | <i>this study</i> |
| MK492320 | <i>P. vlangalii</i>  | <i>P. vlangalii pylzowi</i>   | <b>vl4</b> | ZMMU R-8898_1  | China, Xinjiang, Chemo (= Cherchen, Tzemo), Middle Kunlun, Achik-kul Depression, Minbulak                     | 37.9   | 87.7   | <i>this study</i> |

|          |                                |                             |               |                |                                                                                             |        |        |                   |
|----------|--------------------------------|-----------------------------|---------------|----------------|---------------------------------------------------------------------------------------------|--------|--------|-------------------|
| MK492322 | <i>P. vlangalii</i>            | <i>P. vlangalii pylzowi</i> | <b>vl4</b>    | ZMMU R-14325   | China, Qinghai, Tasan Nur                                                                   | 35.264 | 98.761 | <i>this study</i> |
| MF039059 | <i>P. vlangalii pylzowi</i>    | <i>P. vlangalii pylzowi</i> | <b>vl5</b>    | -              | China: Maqu Xian, Gannan Tibetan Autonomous Prefecture, Gansu Province                      | 34.96  | 102.90 | [86]              |
| MF039060 | <i>P. vlangalii pylzowi</i>    | <i>P. vlangalii pylzowi</i> | <b>vl6</b>    | -              | China: Maduo County, Tibetan Autonomous Prefecture of Golog, Qinghai Province               | 34.44  | 98.06  | [86]              |
| MF039063 | <i>P. theobaldi theobaldi</i>  | <i>Phrynocephalus</i> sp. 1 | <b>sp1</b>    | -              | China, Tibet, Ngari Prefecture                                                              | 33.12  | 80.25  | [86]              |
| KF691720 | <i>Phrynocephalus</i> sp. 2    | <i>Phrynocephalus</i> sp. 2 | <b>sp2.1</b>  | ZMMU R-12301   | China, Tibet, Xizang, 20 km from Pelguzo Lake                                               | 28.665 | 85.879 | [12]              |
| MF039062 | <i>P. theobaldi orientalis</i> | <i>Phrynocephalus</i> sp. 2 | <b>sp2.2</b>  | -              | China, Tibet, Brahmaputra River valley                                                      | 30.03  | 83.49  | [86]              |
| MK461484 | <i>P. interscapularis</i>      | <i>Phrynocephalus</i> sp. 3 | <b>sp34.1</b> | 2204int4       | Uzbekistan, 2 km N Chukurkuduk                                                              | 40.83  | 66.63  | <i>this study</i> |
| MK461485 | <i>P. interscapularis</i>      | <i>Phrynocephalus</i> sp. 3 | <b>sp34.1</b> | 2204int5       | Uzbekistan, 2 km N Chukurkuduk                                                              | 40.83  | 66.63  | <i>this study</i> |
| MK461374 | <i>P. interscapularis</i>      | <i>Phrynocephalus</i> sp. 3 | <b>sp3.2</b>  | ZMMU R-12146-2 | Uzbekistan, Navoi, 20 km N from Kataich, Lake Aidarkul                                      | 40.66  | 66.61  | <i>this study</i> |
| MK461375 | <i>P. interscapularis</i>      | <i>Phrynocephalus</i> sp. 3 | <b>sp3.2</b>  | ZMMU R-12146-1 | Uzbekistan, Navoi, 20 km N from Kataich, Lake Aidarkul                                      | 40.66  | 66.61  | <i>this study</i> |
| MW940436 | <i>P. maculatus</i>            | <i>Phrynocephalus</i> sp. 4 | <b>sp4</b>    | ERP 8793       | Iran, Yazd province, Abarkooh                                                               | 31.227 | 53.43  | [87]              |
| MW940437 | <i>P. maculatus</i>            | <i>Phrynocephalus</i> sp. 4 | <b>sp4</b>    | ERP 8795       | Iran, Yazd province, Abarkooh                                                               | 31.227 | 53.43  | [87]              |
| MW940438 | <i>P. maculatus</i>            | <i>Phrynocephalus</i> sp. 4 | <b>sp4</b>    | ERP 8796       | Iran, Yazd province, Abarkooh                                                               | 31.227 | 53.43  | [87]              |
| MW940439 | <i>P. maculatus</i>            | <i>Phrynocephalus</i> sp. 4 | <b>sp4</b>    | ERP 8800       | Iran, Kerman province, Sirjan                                                               | 29.446 | 55.48  | [87]              |
| JF769378 | <i>P. cameranoi</i>            | <i>Phrynocephalus</i> sp. 5 | <b>sp5</b>    | ZMMU R-12812   | Kazakhstan, Taldy-Kurgan, Ili Depression, Ili Riv., 10 km E from Aktau                      | 44.083 | 79.467 | [19]              |
| JF769380 | <i>P. cameranoi</i>            | <i>Phrynocephalus</i> sp. 5 | <b>sp5</b>    | ZMMU R-12665   | Kazakhstan, Taldy-Kurgan, Ili Depression, sands on the right side of Zharkent - Khorgos Rd. | 44.217 | 80.25  | [19]              |
| JF769382 | <i>P. cameranoi</i>            | <i>Phrynocephalus</i> sp. 6 | <b>sp6</b>    | ZMMU R-12662   | Kazakhstan, SKazakhstan, Chimkent, N foothills of Karatau, near Suzak                       | 44.316 | 68.6   | [19]              |

|          |                      |                              |               |                     |                                                                                                                     |        |        |                   |
|----------|----------------------|------------------------------|---------------|---------------------|---------------------------------------------------------------------------------------------------------------------|--------|--------|-------------------|
| JF769389 | <i>P. cameranoi</i>  | <i>Phrynocephalus</i> sp. 6  | <b>sp6</b>    | ZMMU R-12165        | Kazakhstan, Taraz, NE Karatau, Lake Kyzylkol                                                                        | 43.79  | 69.54  | [19]              |
| OP970518 | <i>P. saidalievi</i> | <i>Phrynocephalus</i> sp. 7  | <b>sp7</b>    | RAN-4429            | Kirgizstan, Batkent prov., Kadamjskiy dist., near Sovetskiy vill.                                                   | 40.25  | 71.34  | <i>this study</i> |
| OP970519 | <i>P. saidalievi</i> | <i>Phrynocephalus</i> sp. 7  | <b>sp7</b>    | RAN-4430            | Kirgizstan, Batkent prov., Kadamjskiy dist., near Sovetskiy vill.                                                   | 40.25  | 71.34  | <i>this study</i> |
| OP970520 | <i>P. saidalievi</i> | <i>Phrynocephalus</i> sp. 7  | <b>sp7</b>    | RAN-4431            | Kirgizstan, Batkent prov., Kadamjskiy dist., near Sovetskiy vill.                                                   | 40.25  | 71.34  | <i>this study</i> |
| OP970521 | <i>P. saidalievi</i> | <i>Phrynocephalus</i> sp. 7  | <b>sp7</b>    | RAN-4432            | Kirgizstan, Batkent prov., Kadamjskiy dist., near Sovetskiy vill.                                                   | 40.25  | 71.34  | <i>this study</i> |
| OP970522 | <i>P. saidalievi</i> | <i>Phrynocephalus</i> sp. 7  | <b>sp7</b>    | RAN-4433            | Kirgizstan, Batkent prov., Kadamjskiy dist., near Sovetskiy vill.                                                   | 40.25  | 71.34  | <i>this study</i> |
| JF769421 | <i>P. persicus</i>   | <i>Phrynocephalus</i> sp. 8  | <b>sp8</b>    | ZMMU R-12466        | Azerbaijan, Naxcivan, NW from Nachichevan city                                                                      | 39.283 | 45.283 | [19]              |
| JF756689 | <i>P. persicus</i>   | <i>Phrynocephalus</i> sp. 9  | <b>sp9</b>    | FH_10_4, no voucher | Iran, Ardebil env.                                                                                                  | 38.393 | 48.368 | [19]              |
| JF769416 | <i>P. persicus</i>   | <i>Phrynocephalus</i> sp. 10 | <b>sp10</b>   | ZMMU R-12786        | Azerbaijan, Apsheron, near Sangachaly                                                                               | 40.15  | 49.467 | [19]              |
| MK461365 | <i>P. ocellatus</i>  | <i>Phrynocephalus</i> sp. 11 | <b>sp11.1</b> | ZMMU R-12136-2      | Uzbekistan, Qoraqalpog'iston, Mingdulak                                                                             | 42.23  | 62.86  | <i>this study</i> |
| MK461364 | <i>P. ocellatus</i>  | <i>Phrynocephalus</i> sp. 11 | <b>sp11.1</b> | ZMMU R-12136-1      | Uzbekistan, Qoraqalpog'iston, Mingdulak                                                                             | 42.23  | 62.86  | <i>this study</i> |
| MK461477 | <i>P. ocellatus</i>  | <i>Phrynocephalus</i> sp. 11 | <b>sp11.2</b> | 3004oc1             | Uzbekistan, Kyzylkum sands, 17 km NW Uchkuduk                                                                       | 42.28  | 63.44  | <i>this study</i> |
| MK461478 | <i>P. ocellatus</i>  | <i>Phrynocephalus</i> sp. 11 | <b>sp11.2</b> | 3004oc3             | Uzbekistan, Kyzylkum sands, 17 km NW Uchkuduk                                                                       | 42.28  | 63.44  | <i>this study</i> |
| KF691709 | <i>P. ocellatus</i>  | <i>Phrynocephalus</i> sp. 11 | <b>sp11.3</b> | ZMMU R-12272        | Uzbekistan, Navoi, west bank of Mingbulak Depression, 25 km SW from Mingdulak, east border Dzhar Hillock            | 42.118 | 62.744 | [2]               |
| KF691738 | <i>P. hispidus</i>   | <i>Phrynocephalus</i> sp. 12 | <b>sp12</b>   | KIZ 014303          | China, Gansu, Jiuguan City                                                                                          | 39.68  | 98.45  | [2]               |
| KF691726 | <i>P. melanurus</i>  | <i>Phrynocephalus</i> sp. 13 | <b>sp13</b>   | ZMMU R-12327        | Kazakhstan, East Kazakhstan, Alakol Depression, plain between Alakol and Zhalanashkol Lakes, 55 km S from Karabulak | 45.643 | 82.176 | [12]              |

|          |                                 |                                 |             |                |                                                                                                    |        |        |      |
|----------|---------------------------------|---------------------------------|-------------|----------------|----------------------------------------------------------------------------------------------------|--------|--------|------|
| MF567976 | <i>P. melanurus</i>             | <i>Phrynocephalus</i> sp. 13    | <b>sp13</b> | ZMMU R-12328   | Kazakhstan, Junggar Gates, 10 km NW from Druzhba                                                   | 45.314 | 82.423 | [21] |
| MK461428 | <i>P. melanurus</i>             | <i>Phrynocephalus</i> sp. 13    | <b>sp13</b> | ZMMU R-12327-2 | Kazakhstan, Alakol valley, 55 km S Karabulak                                                       | 45.643 | 82.176 | [13] |
| MK461384 | <i>P. melanurus</i>             | <i>Phrynocephalus</i> sp. 13    | <b>sp13</b> | ZMMU R-12177   | Kazakhstan, border of Alma-Aty and E Kazakhstan provinces, Lake Zhalanashkol                       | 45.4   | 82.09  | [13] |
| MK461456 | <i>P. melanurus</i>             | <i>Phrynocephalus</i> sp. 13    | <b>sp13</b> | ZMMU R-12784   | Kazakhstan, Taldy-Kurgan, Junggar Gate, near Junggar railway station                               | 45.233 | 82.483 | [13] |
| MK461410 | <i>P. melanurus</i>             | <i>Phrynocephalus</i> sp. 13    | <b>sp13</b> | ZMMU R-12327-1 | Kazakhstan, Alakol Depression, plain between Alakol and Zhalanashkol Lakes, 55 km S from Karabulak | 45.643 | 82.176 | [13] |
| KF691700 | <i>Stellagama stellio</i>       | <i>Stellagama stellio</i>       | -           | ZMMU R-11324   | Israel, Rekhovot                                                                                   | 31.88  | 34.8   | [12] |
| KF691701 | <i>Paralau dakia caucasia</i>   | <i>Paralau dakia caucasia</i>   | -           | ZMMU R-12465   | Azerbaijan, Lerik, Zuvand, Kelvyaz                                                                 | 38.61  | 48.35  | [12] |
| KF691702 | <i>Paralau dakia lehmanni</i>   | <i>Paralau dakia lehmanni</i>   | -           | ZMMU R-12248   | Uzbekistan, Navoi, Nuratau, Kataich                                                                | 40.61  | 66.58  | [12] |
| KF691703 | <i>Paralau dakia microlepis</i> | <i>Paralau dakia microlepis</i> | -           | ZMMU R-12207   | Iran, Khorasan, Birjant, Sedeh                                                                     | 39.85  | 59.894 | [12] |
